# Supplementary material for: Transcription factor condensates, 3D clustering, and gene expression enhancement of the MET regulon
Source: eLife. 2024 Sep 30;13:RP96028. doi: 10.7554/eLife.96028 (PMC11441978; doi:10.7554/eLife.96028)
Supplement: Supplementary file 1. [file elife-96028-supp1.xlsx]

## Sheet: Strains used in this study
Name	Genotype	Note
yJL16	MATa, leu2-3,112, his3-11, trp1-1, ura3-1, can1-100, ade2-1, MET4::MET4-GFP::HIS3	Met4-GFP
yJL35	MATa, leu2-3,112, his3-11, trp1-1, ura3-1, can1-100, ade2-1, MET4::MET4-GFP::HIS3, MET32::MET32-mCherry-ADE2	Met4-GFP, Met32-mCherry
yJL25	MATa, leu2-3,112, his3-11, trp1-1, ura3-1, can1-100, MET32::MET32-mCherry-ADE2,	Met32-mCherry
yJL142	MATa, leu2-3,112, his3-11, trp1-1, ura3-1, can1-100, ade2-1, ade2::HOpr-mCherry-NLS-PEST-ADE2	Free mCherry
DY14559	MATa, leu2-3,112, his3-11, trp1-1, ura3-1, can1-100, ADE2-1, HO::HOpr-GFP-Cln2pest-His3, swi2-314, my01:my01-mcherry-SpHis3,	Free GFP
BY4741-Reb1_GFP	MATa, his3Δ1, leu2Δ0, met15Δ0, ura3Δ0, REB1::REB1-GFP::HIS3	Reb1-GFP
BY4741-Cbf1_GFP	MATa, his3Δ1, leu2Δ0, met15Δ0, ura3Δ0, CBF1::CBF1-GFP::HIS3	Cbf1-GFP
BY4741-Sth1_GFP	MATa, his3Δ1, leu2Δ0, met15Δ0, ura3Δ0, STH1::STH1-GFP::HIS3	Sth1-GFP
yJL34	MATa, leu2-3,112, his3-11, trp1-1, ura3-1, can1-100, MET32::MET32-mCherry-ADE2, STH1::STH1-GFP-HIS3-11	Sth1-GFP, Met32-mCherry
yJL57	MATa, leu2-3,112, his3-11, trp1-1, ura3-1, can1-100, ade2-1, MET4::MET4-TAP-HIS3	Met4-TAP
yJL66	MATa, leu2-3,112, his3-11, trp1-1, ura3-1, can1-100, ade2-1, MET32::MET32-TAP-HIS3	Met32-TAP
yJL67	MATa, leu2-3,112, his3-11, trp1-1, ura3-1, can1-100, ade2-1, MET28::MET28-TAP-HIS3-11	Met28-TAP
yJL68	MATa, leu2-3,112, his3-11, trp1-1, ura3-1, can1-100, ade2-1, CBF1::CBF1-TAP-HIS3	Cbf1-TAP
yJL31	MATa, leu2-3,112, his3-11, trp1-1, ura3-1, can1-100, ade2-1,MET4::MET4-GFP-HIS3, trp1::tetO-TRP1, ura3::SCS3(MET13)-URA3, ade2::TetR-mCherry-ADE2	MET13 loci labeled, Met4-GFP
yJL33	MATa, leu2-3,112, his3-11, trp1-1, ura3-1, can1-100, ade2-1,MET4::MET4-GFP-HIS3, trp1::tetO-TRP1, ura3::MAT-URA3, ade2::TetR-mCherry-ADE2	MAT loci labeled, Met4-GFP
yJL41	MATa, leu2-3,112, his3-11, trp1-1, ura3-1, can1-100, ade2-1,MET4::MET4-GFP-HIS3, trp1::tetO-TRP1, ura3::MET6-URA3,ade2::TetR-mCherry-ADE2	MET6 loci labeled, Met4-GFP
yJL39	MATa, leu2-3,112, his3-11, trp1-1, ura3-1, can1-100, ade2-1,MET4::MET4-GFP-HIS3, trp1::tetO-TRP1, ura3::PUT1-URA3, ade2::TetR-mCherry-ADE2	PUT1 loci labeled, Met4-GFP
yLB121a-MET13	MATa, leu2-3,112, his3-11, trp1-1, ura3-1, can1-100, ade2-1,ADH1::2xlexO-GAL1corepr-LacI-SV40NLS-M.CviPI:ADH1pr-LexA-ERHBD-VP16AD::LEU2, MET13::256XLacO::HIS3	MET13 VP MTAC
yLB121a	MATa, leu2-3,112, his3-11, trp1-1, ura3-1, can1-100, ade2-1,ADH1::2xlexO-GAL1corepr-LacI-SV40NLS-M.CviPI:ADH1pr-LexA-ERHBD-VP16AD::LEU2	MTAC control
yJL138	MATa, leu2-3,112, his3-11, trp1-1, ura3-1, can1-100, ade2-1,ADH1::2xlexO-GAL1corepr-LacI-SV40NLS-M.CviPI:ADH1pr-LexA-ERHBD-VP16AD::LEU2, SHC1 (MET6)::256XLacO::HIS3, MET4::MET4-AID-Hygromycin	MET6 VP MTAC, Met4-AID
yJL139	MATa, leu2-3,112, his3-11, trp1-1, ura3-1, can1-100, ade2-1,ADH1::2xlexO-GAL1corepr-LacI-SV40NLS-M.CviPI:ADH1pr-LexA-ERHBD-VP16AD::LEU2MET4::MET4-AID-Hygromycin	MTAC control, Met4-AID
yJL6	MATalpha, leu2-Δ98, ura3-52, lys2-801, trp1-1, ade2-101,his3-11, RSM23::KanMx-MET3pr-GFP+/-	RSM23 reporter gene insert
yJL44	MATalpha, leu2-Δ98, ura3-52, lys2-801, trp1-1, ade2-101,his3-11, CWC23::KanMx-MET3pr-GFP+/-	CWC23 reporter gene insert
yJL69	MATa, leu2-Δ98, ura3-52, lys2-801, trp1-1, ade2-101, his3-11,MET4::MET4-TAP-HIS3, CWC23::KanMx-MET3pr-GFP+/-	CWC23 reporter gene insert, Met4-TAP
yJL70	MATalpha, leu2-Δ98, ura3-52, lys2-801, trp1-1, ade2-101, MET4::Met4-TAP-HIS3, RSM23::KanMx-MET3pr-GFP+/-,	RSM23 reporter gene insert, Met4-TAP
yJL73	MATa, leu2-Δ98, ura3-52, lys2-801, trp1-1, ade2-101, his3-11, MET32::MET32-TAP-HIS3, CWC23::KanMx-MET3pr-GFP+/-	CWC23 reporter gene insert, Met32-TAP
yJL75	MATalpha, leu2-Δ98, ura3-52, lys2-801, trp1-1, ade2-101,his3-11, MET32::MET32-TAP-HIS3, RSM23::KanMx-MET3pr-GFP+/-	RSM23 reporter gene insert, Met32-TAP
yJL77	MATa, leu2-Δ98, ura3-52, lys2-801, trp1-1, ade2-101, his3-11, MET4::Met4-TAP-HIS3, LDS2::KanMx-MET3pr-GFP+/-	LDS2 reporter gene insert, Met4-TAP
yJL79	MATa, leu2-Δ98, ura3-52, lys2-801, trp1-1, ade2-101, his3-11,MET32::MET32-TAP-HIS3, LDS2::KanMx-MET3pr-GFP+/-	LDS2 reporter gene insert, Met32-TAP
yJL81	MATa, leu2-Δ98, ura3-52, lys2-801, trp1-1, ade2-101, his3-11, MET4::Met4-TAP-HIS3, ATG36::KanMx-MET3pr-GFP+/-	ATG36 reporter gene insert, Met4-TAP
yJL83	MATa, leu2-Δ98, ura3-52, lys2-801, trp1-1, ade2-101, his3-11, MET32::MET32-TAP-HIS3, ATG36::KanMx-MET3pr-GFP+/-	ATG36 reporter gene insert, Met32-TAP
yJL45	MATa, leu2-Δ98, ura3-52, lys2-801, trp1-1, ade2-101, lys2-801, MET4::MET4GFP-HIS3, trp1::tetO-TRP1-1, ade2::TetR-mCherry-ADE2, PUT1::S.kud Met3pr-GFP::G418 (GFP frameshift)	PUT1 loci labeled, Met4-GFP, reporter GFP(frameshift) insert
yJL49	MATa, leu2-Δ98, ura3-52, lys2-801, trp1-1, ade2-101, his3-11, MET4::MET4GFP-HIS3, trp1::tetO-TRP1, ade2::TetR-mCherry::ADE2, MET6::S.kud Met3pr-GFP::G418 (GFP frameshift)	MET6 loci labeled, Met4-GFP, reporter GFP(frameshift) insert
yJL46	MATa, leu2-Δ98, ura3-52, lys2-801, trp1-1, ade2-101, his3-11, MET4::MET4GFP-HIS3, trp1::tetO-TRP1, ade2::TetR-mCherry::ADE2, ATG36::S.kud Met3pr-GFP::G418 (GFP frameshift)	ATG36 loci labeled, Met4-GFP, reporter GFP(frameshift) insert
yJL87	MATa, leu2, his3, trp1, ura3, can1, ade2, chrV.343066 (1.2kb upst MET6 gene)::S.kud MET3pr-GFP-KanMX	MET Transcriptional hotspot vs basal (GFP reporter gene activity)
yJL88	MATa, leu2, his3, trp1, ura3, can1, ade2, chrV.343066 (1.2kb upst MET6 gene)::GAL1Spr-GFP-KanMX
yJL107	MATa,leu2-Δ98, ura3-52, lys2-801, his3, trp1-1, ade2-101, chrXII.730576 (MET17 gene)::S.kud MET3prGFP-KanMx
yJL108	MATa,leu2-Δ98, ura3-52, lys2-801, his3, trp1-1, ade2-101, chrXII.730576 (MET17 gene)::GAL1sprGFP-KanMx
yJL105	MATa,leu2-Δ98, ura3-52, lys2-801, his3, trp1-1, ade2-101, chrV.12198 (RMD6 gene)::S.kud MET3prGFP-KanMx
yJL106	MATa,leu2-Δ98, ura3-52, lys2-801, his3, trp1-1, ade2-101, chrV.12198 (RMD6 gene)::GAL1sprGFP-KanMx
yJL109	MATa,leu2-Δ98, ura3-52, lys2-801, his3, trp1-1, ade2-101, chrX.82923 (ATG36 gene)::S.kud MET3prGFP-KanMx
yJL111	MATa,leu2-Δ98, ura3-52, lys2-801, his3, trp1-1, ade2-101, chrX.82923 (ATG36 gene)::GAL1sprGFP-KanMx
yJL110	MATa,leu2-Δ98, ura3-52, lys2-801, his3, trp1-1, ade2-101, chrXV.241691 (LDS2 gene)::S.kud MET3prGFP-KanMx
yJL112	MATa,leu2-Δ98, ura3-52, lys2-801, his3, trp1-1, ade2-101, chrXV.241691 (LDS2 gene)::GAL1sprGFP-KanMx
yJL121	MATa,leu2-Δ98, ura3-52, lys2-801, his3, trp1-1, ade2-101, chrX.82923 (ATG36 gene)::MET17prGFP-KanMx
yJL122	MATa,leu2-Δ98, ura3-52, lys2-801, his3, trp1-1, ade2-101, chrXV.241691 (LDS2 gene)::MET17prGFP-KanMx
yJL120	MATa,leu2-Δ98, ura3-52, lys2-801, his3, trp1-1, ade2-101, chrVII.272493 (MET13)::MET17prGFP-KanMx
yJL116	MATa,leu2-Δ98, ura3-52, lys2-801, his3, trp1-1, ade2-101, chrV.343066 (1.2kb upst MET6 gene)::MET17prGFP-KanMx
yJL118	MATa,leu2-Δ98, ura3-52, lys2-801, his3, trp1-1, ade2-101, chrV.12198 (RMD6 gene)::MET17prGFP-KanMx
yJL123	MATa,leu2-Δ98, ura3-52, lys2-801, his3, trp1-1, ade2-101, chrVII.272493 (MET13)::GAL1sprGFP-KanMx
yJL99	MATa,leu2-Δ98, ura3-52, lys2-801, his3, trp1-1, ade2-101, chrV.291895 (51kb upst of MET6 gene)::S.kud MET3prGFP-KanMx	Reporter Gene insertion in various distance from MET6 gene
yJL101	MATa,leu2-Δ98, ura3-52, lys2-801, his3, trp1-1, ade2-101, chrV.291895 (51kb upst of MET6 gene)::GAL1sprGFP-KanMx
yJL95	MATa,leu2-Δ98, ura3-52, lys2-801, his3, trp1-1, ade2-101, chrV.311587(31kb upst of MET6 gene)::S.kud MET3prGFP-KanMx
yJL96	MATa,leu2-Δ98, ura3-52, lys2-801, his3, trp1-1, ade2-101, chrV.311587(31kb upst of MET6 gene)::GAL1sprGFP-KanMx
yJL85	MATa,leu2-Δ98, ura3-52, lys2-801, his3, trp1-1, ade2-101, chrV.322997(16kb upst of MET6 gene)::S.kud MET3prGFP-KanMx
yJL86	MATa,leu2-Δ98, ura3-52, lys2-801, his3, trp1-1, ade2-101, chrV.322997(16kb upst of MET6 gene)::GAL1sprGFP-KanMx
yJL89	MATa,leu2-Δ98, ura3-52, lys2-801, his3, trp1-1, ade2-101, chrV.330440 (5kb upst of MET6 gene)::S.kud MET3prGFP-KanMx
yJL90	MATa,leu2-Δ98, ura3-52, lys2-801, his3, trp1-1, ade2-101, chrV.330440 (5kb upst of MET6 gene)::GAL1sprGFP-KanMx
yJL93	MATa,leu2-Δ98, ura3-52, lys2-801, his3, trp1-1, ade2-101, chrV.346797 (5kb dwst of MET6 gene)::S.kud MET3prGFP-KanMx
yJL94	MATa,leu2-Δ98, ura3-52, lys2-801, his3, trp1-1, ade2-101, chrV.346797 (5kb dwst of MET6 gene)::GAL1sprGFP-KanMx
yJL97	MATa,leu2-Δ98, ura3-52, lys2-801, his3, trp1-1, ade2-101, chrV.361180 (20kb dwst of MET6 gene)::S.kud MET3prGFP-KanMx
yJL98	MATa,leu2-Δ98, ura3-52, lys2-801, his3, trp1-1, ade2-101, chrV.361180 (20kb dwst of MET6 gene)::GAL1sprGFP-KanMx
yJL100	MATa,leu2-Δ98, ura3-52, lys2-801, his3, trp1-1, ade2-101, chrV.428116 (81kb dwst of MET6 gene)::S.kud MET3prGFP-KanMx
yJL102	MATa,leu2-Δ98, ura3-52, lys2-801, his3, trp1-1, ade2-101, chrV.428116 (81kb dwst of MET6 gene)::GAL1sprGFP-KanMx
yJL19	MATa, leu2-3,112, his3-11, trp1-1, ura3-1, can1-100, ade2-1, MET4::MET4-GFP(∆IDR1)-HIS3	MET4 (∆IDR1 truncation)-GFP
yJL20	MATa, leu2-3,112, his3-11, trp1-1, ura3-1, can1-100, ade2-1, MET4::MET4-GFP(∆IDR2)-HIS3	MET4 (∆IDR2 truncation)-GFP
yJL22	MATa, leu2-3,112, his3-11, trp1-1, ura3-1, can1-100, ade2-1, MET4::MET4-GFP(∆IDR3)-HIS3	MET4 (∆IDR3 truncation)-GFP
yJL23	MATa, leu2-3,112, his3-11, trp1-1, ura3-1, can1-100, ade2-1, MET4::MET4-GFP(∆IDR2.3)-HIS3	MET4 (∆IDR2.1 truncation)-GFP
yJL24	MATa, leu2-3,112, his3-11, trp1-1, ura3-1, can1-100, ade2-1, MET4::MET4-GFP(∆IDR2.1)-HIS3	MET4 (∆IDR2.2 truncation)-GFP
yJL25	MATa, leu2-3,112, his3-11, trp1-1, ura3-1, can1-100, ade2-1, MET4::MET4-GFP(∆IDR2.2)-HIS3	MET4 (∆IDR2.3 truncation)-GFP
yJL59	MATa, leu2-3,112, his3-11, trp1-1, ura3-1, can1-100, ade2-1, MET4::MET4-TAP(∆IDR2.3)-HIS3	MET4 (∆IDR2.3 truncation)-TAP
yJL127	MATalpha,leu2-Δ98, ura3-52, lys2-801, his3, trp1-1, ade2-101, MET4::MET4(∆IDR2.3)-HIS3, RSM23::KanMx-MET3pr-GFP+/-	MET hotspot vs basal (GFP reporter gene activity) in MET4 (∆IDR2.3) strain
yJL128	MATa,leu2-Δ98, ura3-52, lys2-801, his3, trp1-1, ade2-101, MET4::MET4(∆IDR2.3)-HIS3, CWC23::KanMx-MET3pr-GFP+/-
yJL129	MATa,leu2-Δ98, ura3-52, lys2-801, his3, trp1-1, ade2-101, MET4::MET4(∆IDR2.3)-HIS3, ATG36::KanMx-MET3pr-GFP+/-
yJL130	MATa,leu2-Δ98, ura3-52, lys2-801, his3, trp1-1, ade2-101, MET4::MET4(∆IDR2.3)-HIS3, LDS2::KanMx-MET3pr-GFP+/-
yJL131	MATa,leu2-Δ98, ura3-52, lys2-801, his3, trp1-1, ade2-101, MET4::MET4(∆IDR2.3)-HIS3, chrV.343066 (1.2kb upst MET6 gene)::S.kud MET3pr-GFP-KanMX
yJL132	MATa,leu2-Δ98, ura3-52, lys2-801, his3, trp1-1, ade2-101, MET4::MET4(∆IDR2.3)-HIS3, chrXII.730576 (MET17 gene)::S.kud MET3prGFP-KanMx
yJL133	MATa,leu2-Δ98, ura3-52, lys2-801, his3, trp1-1, ade2-101, MET4::MET4(∆IDR2.3)-HIS3, chrV.12198 (RMD6 gene)::S.kud MET3prGFP-KanMx

## Sheet: Primers used in this study
Name	Primer Sequence	Purpose
PMYF1 GFP	gtctccggtgaaggtgaaggtg	Reporter GFP qRT-PCR
PMYR1 GFP	ctaaggttggccatggaactggc	Reporter GFP qRT-PCR
Actin CDS F	ggttattgataacggttctggtatgtgt	Actin qPCR (normalization)
Actin CDS R	ggattgagcttcatcaccaacg	Actin qPCR (normalization)
chIP Met3 F1	tgaagcgccctttgcggtag	TAP ChIP-qPCR of S.kud MET3pr
chIP Met3 R1	cacttataggctgattccttt	TAP ChIP-qPCR of S.kud MET3pr
Met13pr F New	gctcgtggaaaagctaatgcc	Rpb1 ChIP-qPCR of MET13 ORF
Met13pr R New	ctgtgatcttcatattgcgatgtgg	Rpb1 ChIP-qPCR of MET13 ORF
Met6 PR1 F	gagtcatcgcagtcatggcagctc	TAP ChIP-qPCR of S.cere MET6pr
Met6 PR1 R	gctagcttcccttaaattagtgcatc	TAP ChIP-qPCR of S.cere MET6pr
PF Met4 GFP Integration	gcttaaagaagcaaatttttgagaaggttcagaaagaaagtaaaggagaagaacttttca	Integration of GFP-HIS3 to MET4
PR Met4 GFP Integration	cgtatatatatatatatatataattaaactgtatagtctgttattcagtatagcgaccag	Integration of GFP-HIS3 to MET4
Met32-mCherry Inte F	ctgaaaaaagtcaagcaatccaacatcgttcatcgtcaagataacaaccacaatggtagcagtaatggcgtgagcaagggcga	Integration of mCherry-ADE2 to MET32
Met32-mCherry Inte R	taatgttgcagatgaatatatattttcttatttgagaagatacacgctatttactcttattcttgaataatacataacttttcttaaaag	Integration of mCherry-ADE2 to MET32
ATG36_PHK4_F	ctccagaatgtacaaatactgccattagtcgcgatgagacactggaatctgcaagtagtgccttcgaaatattaccctgttatccctagcg	S.kud MET3pr insertion near ATG36
ATG36_PHK4_R	gctgctctgagggcggagaatttttattgctgtcactggatatcgacagtatagcaatttcgtcagaaggaacctgggcagatgatgtcgag	S.kud MET3pr insertion near ATG36
LDS2_PHK4_F	gccctttctcggactctttgcgttacctctggcttatatgcaaactattctgatttccacaacgctatgtaattcatattaccctgttatccctagcg	S.kud MET3pr insertion near LDS2
LDS2_PHK4_R	ctctgttaatccctttcttgcgaacgtcactccataaatacgtgtgaaaagaacgaaatcggtacccttcaccatactgggcagatgatgtcgag	S.kud MET3pr insertion near LDS2
Met6pr_PKH4 F	atctatcgcatttgttccatattcacattcacagttctcaattgagcagaacgagctatgactaccacagatattaccctgttatccctagcg	S.kud MET3pr insertion near MET6
Met6pr_PKH4 R	aaggccaatatttttcgctagagtcatcgcagtcatggcagctctttcgctctatctcccggtcgcaaaactgggcagatgatgtcgag	S.kud MET3pr insertion near MET6
MET17_PHK4 F	tcttgtcttttcatctactatttccttcgtgtaatacagggtcgtcagatacatagatacaattctattacccatattaccctgttatccctagcg	S.kud MET3pr insertion near MET17
MET17_PHK4 R	ttgtcaccagggttctcttggccggcgtgtagttgaacagtatcgaaatgagatggcattgtatggatggctgggcagatgatgtcgag	S.kud MET3pr insertion near MET17
RMD6_PHK4_F	aatacaccttactcttggtcgtgattgaaaacgtaaggttctacataaattattgagaaagatattaccctgttatccctagcg	S.kud MET3pr insertion near RMD6
RMD6_PHK4_R	gcaagggcaagctgacattagttttgttgtgcaaagggcatgatagactctcgatatcttcaaataagtctgggcagatgatgtcgag	S.kud MET3pr insertion near RMD6
Cbf1 TAP His F	cgaggatatgcacactcacaagaaacaagagaacgaaagaaaaagcactaggagcgataatccacatgaggctggtcgacggatccccgg	TAP tagging of Cbf1
Cbf1 TAP His R	ctatggggcagagacgcagatacatagggagactcgaaatacatttagctatctatttttaactctcgatgaattcgagctcgtttaaac	TAP tagging of Cbf1
M32 TAP His F	gaattactgaaaaaagtcaagcaatccaacatcgttcatcgtcaagataacaaccacaatggtagcagtaatggcggtcgacggatcccc	TAP tagging of Met32
M32 TAP His R	aatgctatcacattaatgttgcagatgaatatatattttcttatttgagaagatacacgctatttactctttcgatgaattcgagctcgt	TAP tagging of Met32
Met28 TAP His F	agcaaagctcaatgacattaacgagattaagtctttgaaattgttgaatgacattaagagacggaacatgggcaggggtcgacggatccc	TAP tagging of Met28
Met28 TAP His R	aaagaaacggaaaaatcgaaaaatcgaagttggagaggaaaaacaagacatcaggcccgcacgtttcgcgggtcgatgaattcgagctcg	TAP tagging of Met28
MET4 Forward c-PCR	ctgtccgtcaactgtttagac	PCR check of Met4 IDR truncations
Met4 1-69, 1-160 check R	gtctattattggtagaagggtcctcatgcaatacgt	PCR check of Met4 IDR truncations
Met4 117-359, Aux Check R	gatacgccattattgcggctatagcatctatttgatc	PCR check of Met4 IDR truncations

## Sheet: Plasmids used in this study
Plasmid Name	Source	Description
pJL1	this study	fragment with Met4-GFP for integration into genome
pJL6	this study	fragment with additional Met4 IDR1(1-69)-GFP integration into genome
pJL5	this study	fragment with additional Met4 IDR2(117-359)-GFP integration into genome
pJL4	this study	fragment with additional Met4 IDR3(397-651)-GFP integration into genome
pJL10	this study	fragment with Met4 IDR2.2(136-270)-GFP integration into genome
pJL11	this study	fragment with Met4 IDR2.3(271-359)-GFP integration into genome
pJL12	this study	fragment with Met4 IDR2.1(117-221)-GFP integration into genome
pJL19	this study	fragment with Met4-TAP with HIS3 marker for tagging Met4 with TAP tag
pJL20	this study	fragment with Met4 IDR2.3(271-359 truncated)-TAP with HIS3 marker for tagging Met4 with TAP tag
pJL23	this study	integration of S.kud MET3pr-GFP with KanMX marker chrV.346797 (5kb upstream of MET6 gene)
pJL24	this study	integration of GAL1Spr-GFP with KanMX marker chrV.346797 (5kb upstream of MET6 gene)
pJL27	this study	integration of S.kud MET3pr-GFP with KanMX marker chrV.322997(16kb upst of MET6 gene)
pJL28	this study	integration of GAL1Spr-GFP with KanMX marker chrV.322997(16kb upst of MET6 gene)
pJL29	this study	integration of S.kud MET3pr-GFP with KanMX marker chrV.343066 (1.2kb upst MET6 gene)
pJL30	this study	integration of GAL1Spr-GFP with KanMX marker chrV.343066 (1.2kb upst MET6 gene)
pJL32	this study	integration of S.kud MET3pr-GFP with KanMX marker chrV.12198 (1.2kb upstream of RMD6 gene)
pJL33	this study	integration of GAL1Spr-GFP with KanMX marker chrV.12198 (1.2kb upstream of RMD6 gene)
pJL34	this study	integration of S.kud MET3pr-GFP with KanMX marker chrXII.730576 (1.2kb upstream of MET17 gene)
pJL35	this study	integration of GAL1Spr-GFP with KanMX marker chrXII.730576 (1.2kb upstream of MET17 gene)
pJL36	this study	integration of S.kud MET3pr-GFP with KanMX marker chrXII.730576 (1.2kb upstream of MET17 gene)
pJL39	this study	integration of HOpr-mcherry-NLS-PEST into ADE3 marker
pJL40	this study	integration of S.kud MET3pr-GFP with frameshift with KanMX marker chrX.82923 (ATG36 gene)
pJL41	this study	integration of S.kud MET3pr-GFP with frameshift with KanMX marker chrXII.424728 (PUT1 gene)
pSR11	Rohner et al.	192X TetO with a TRP1 marker
pMY39	Du et al.	Rev1pr-TetR-mCherry with ADE2 marker
p22_Met4_MBP	this study	Recombinant expression of 6xHis-Met4-MBP protein
pLS25_Met32mCherry_pET	this study	Recombinant expression of 6xHis-Met32-mCherry protein
pSR15-MET13	Li et al.	256X LacO with MET13 homologs and HIS3 marker
pSR15-SHC1	Li et al.	256X LacO with SHC1 homologs and HIS3 marker
pYL09	Li et al.	2xlexO-GAL1corepr-SV40NLS-M.CviPI and ADH1pr-LexA-ERHBD-VP16AD with LEU2 marker
