# Supplementary material for: Transcription factor condensates, 3D clustering, and gene expression enhancement of the MET regulon
Source: eLife. 2024 Sep 30;13:RP96028. doi: 10.7554/eLife.96028 (PMC11441978; doi:10.7554/eLife.96028)
Supplement: Supplementary file 2. [file elife-96028-supp2.xlsx]

## Sheet: Full Length Met4
Met4-GFP (+met)					Met4-GFP (-met)
Average GFP Intensity	Std Dev.	CV	Fano		Average GFP Intensity	Std Dev.	CV	Fano
323.435	179.513	0.55502	99.6334		563.512	311.755	0.553236	172.474
461.693	249.387	0.540158	134.708		429.67	239.586	0.557605	133.594
269.576	170.316	0.631792	107.604		356.173	213.755	0.600144	128.284
223.448	130.636	0.584637	76.3747		422.713	299.343	0.708147	211.979
286.92	146.257	0.509748	74.5543		489.64	221.811	0.453008	100.482
388.779	166.847	0.429156	71.6035		607.542	366.699	0.603578	221.331
432.434	189.677	0.438626	83.1974		553.466	240.246	0.434075	104.285
398.599	161.035	0.404003	65.0585		497.844	252.237	0.506659	127.798
263.52	128.082	0.486043	62.2533		532.041	279.59	0.525505	146.926
391.159	193.446	0.494546	95.6679		466.214	247.914	0.53176	131.831
429.734	204.711	0.476367	97.5175		455.355	303.155	0.665755	201.827
404.451	229.304	0.566951	130.004		640.747	305.009	0.476021	145.191
296.105	180.628	0.610013	110.185		484.748	278.625	0.574783	160.149
359.55	170.356	0.473803	80.7152		528.427	253.114	0.478995	121.24
390.009	212.955	0.546026	116.279		447.876	301.798	0.673843	203.364
465.893	215.415	0.46237	99.6015		526.023	255.283	0.485308	123.891
429.59	195.506	0.455099	88.9746		479.094	243.749	0.508771	124.012
551.854	231.136	0.418835	96.8079		570.428	447.035	0.783683	350.334
272.53	123.479	0.453084	55.9464		414.286	317.592	0.766601	243.466
401.366	201.677	0.502477	101.338		520.228	336.761	0.647333	217.997
342.532	176.304	0.514708	90.7451		496.684	281.321	0.566398	159.34
226.428	162.38	0.717137	116.449		577.982	359.778	0.622473	223.952
403.258	181.045	0.448956	81.2812		568.611	349.73	0.61506	215.105
479.703	270.182	0.563228	152.174		426.56	379.445	0.889547	337.534
359.843	152.104	0.422695	64.2937		582.783	322.03	0.552573	177.945
408.876	176.255	0.431072	75.9786		505.039	310.451	0.614707	190.836
323.363	169.103	0.522951	88.4326		643.517	304.768	0.473597	144.337
350.981	179.385	0.511096	91.683		557.684	413.858	0.742101	307.125
364.693	188.066	0.515683	96.9824		637.057	445.483	0.699283	311.519
310.542	158.016	0.508839	80.4048		541.592	264.363	0.488122	129.041
372.349	178.39	0.479094	85.4655		508.448	278	0.546762	152
572.864	211.509	0.369213	78.0919		407.94	307.624	0.754091	231.977
723.383	298.858	0.413139	123.47		509.684	341.869	0.670747	229.308
444.225	149.477	0.336489	50.2974		447.844	324.337	0.724219	234.891
579.041	211.207	0.364753	77.0384		410.184	324.14	0.790231	256.145
691.431	232.016	0.335559	77.8551		472.852	252.993	0.535036	135.36
496.323	189.783	0.382378	72.5688		479.373	289.997	0.604951	175.434
673.519	245.127	0.36395	89.2139		591.896	254.688	0.430292	109.59
647.425	225.134	0.347738	78.2876		472.363	309.613	0.655456	202.938
514.038	254.651	0.495393	126.152		455.982	271.535	0.595495	161.698
356.562	143.263	0.40179	57.5616		683.28	371.089	0.543099	201.538
428.973	222.445	0.518552	115.349		622.434	324.379	0.521146	169.049
484.044	252.332	0.5213	131.541		589.255	473.721	0.803932	380.84
629.758	240.987	0.382666	92.2175		484.631	308.931	0.637456	196.93
540.782	234.997	0.43455	102.118		641.585	388.341	0.605284	235.057
440.026	176.761	0.401706	71.0059		687.254	423.073	0.615599	260.443
584.742	210.733	0.360386	75.9453		464.723	276.138	0.594199	164.081
476.826	259.634	0.544505	141.372		414.929	334.671	0.806574	269.937
668.117	308.359	0.461534	142.318		594.772	374.551	0.629739	235.869
725.297	238.406	0.328701	78.3643		518.719	356.137	0.68657	244.513
591.165	258.389	0.437084	112.938		613.821	313.116	0.51011	159.723
507.688	271.279	0.534342	144.956		555.92	344.697	0.620048	213.729
351.357	162.469	0.462404	75.1264		432.013	302.591	0.700421	211.941
512.527	216.139	0.421712	91.1485		713.827	391.387	0.548294	214.595
583.25	231.816	0.397456	92.1366		516.516	314.769	0.609408	191.823
451.716	237.623	0.526045	125		469.654	267.977	0.570584	152.903
473.875	185.384	0.391209	72.5238		657.103	297.561	0.452838	134.747
393.726	216.437	0.549715	118.979		415.371	242.422	0.583628	141.484
393.906	218.052	0.553564	120.706		641.399	303.133	0.472612	143.264
811.907	346.902	0.427268	148.22		461.521	317.343	0.687603	218.206
548.657	226.747	0.413276	93.7092		402.53	268.238	0.66638	178.748
					652.416	332.938	0.510316	169.903
					722.449	289.536	0.40077	116.037
					592.324	331.918	0.560366	185.995
					532.275	255.097	0.479258	122.257
					605.896	322.332	0.531992	171.478
					551.181	304.41	0.552287	168.122
					552.982	335.013	0.60583	202.961
					604.136	304.124	0.503403	153.097
					674.66	372.406	0.551991	205.565
					643.011	421.518	0.655538	276.321
					474.319	338.251	0.71313	241.217
					521.96	345.932	0.662756	229.268
					511.077	277.059	0.542108	150.196
					503.649	257.486	0.511241	131.637
					588.403	278.241	0.472875	131.573
					596.866	275.84	0.462147	127.479
					715.74	346.584	0.484232	167.827
					466.459	284.094	0.609044	173.026
					526.314	263.742	0.501112	132.164
					657.61	316.103	0.480685	151.946
					832.361	433.529	0.520843	225.8
					468.582	302.804	0.646213	195.676
					652.509	429.293	0.657911	282.437
					585.305	308.478	0.527038	162.58
					592.89	373.668	0.630248	235.504
					567.544	293.611	0.517336	151.896
					628.378	317.202	0.504795	160.122
					608.202	276.13	0.45401	125.366
					533.911	261.152	0.48913	127.737
					497.983	264.194	0.530528	140.162
					566.87	264.465	0.466536	123.382
					608.299	269.834	0.443588	119.695
					655.549	292.134	0.445633	130.184
					561.093	278.678	0.49667	138.411
					583.393	290.816	0.498491	144.969
					857.732	345.434	0.40273	139.116
					442.218	233.482	0.527979	123.274
					802.855	353.679	0.440527	155.805
					705.728	409.043	0.579604	237.083
					922.267	552.572	0.599145	331.071
					308.552	224.961	0.729086	164.016
					355.352	231.009	0.650085	150.175
					423.333	223.297	0.527474	117.783
					578.922	323.699	0.559141	180.993
					518.623	417.352	0.804731	335.856
					915.399	351.936	0.384462	135.306
					517.093	291.218	0.563183	164.009
					551.193	358.236	0.649928	232.828
					521.264	350.371	0.672157	235.504
					546.472	345.803	0.632792	218.821
					492.318	302.132	0.613693	185.416
					353.629	240.099	0.678957	163.017
					342.024	185.641	0.542772	100.761
					373.174	223.901	0.599991	134.339
					439.129	245.373	0.558772	137.108
					369.858	275.094	0.743783	204.61
					396.115	316.196	0.798243	252.401
					416.324	387.996	0.931957	361.596
					367.601	240.352	0.653839	157.152
					536.25	278.176	0.518743	144.302
					498.563	315.98	0.633781	200.262
					616.828	266.602	0.432214	115.229
					604.479	331.384	0.548214	181.669
					593.084	281.953	0.475401	134.041
					423.207	249.887	0.59046	147.548
					420.913	270.696	0.643116	174.089
					714.199	333.626	0.467133	155.848
					373.408	263.512	0.705695	185.959
					507.419	354.467	0.698569	247.62
					573.393	338.865	0.590982	200.263
					505.796	281.586	0.556719	156.764
					433.53	363.521	0.838514	304.817
					569.291	326.516	0.573549	187.273
					554.648	272.75	0.491753	134.126
					473.902	341.6	0.720824	246.234
					563.9	282.279	0.500583	141.304
					708.679	331.548	0.467839	155.111
					569.213	346.409	0.608575	210.816
					799.603	370.536	0.4634	171.706
					849.704	350.03	0.411943	144.193
					718.448	492.666	0.685736	337.839
					834.456	439.323	0.526478	231.294

## Sheet: Met4 mutants
ΔIDR1-GFP (-met)					ΔIDR2-GFP (-met)					ΔIDR3-GFP (-met)					ΔIDR2.1-GFP (-met)					ΔIDR2.2-GFP (-met)					ΔIDR2.3-GFP (-met)
Average GFP Intensity	Std Dev.	CV	Fano		Average GFP Intensity	Std Dev.	CV	Fano		Average GFP Intensity	Std Dev.	CV	Fano		Average GFP Intensity	Std Dev.	CV	Fano		Average GFP Intensity	Std Dev.	CV	Fano		Average GFP Intensity	Std Dev.	CV	Fano
709.398	363.126	0.511879	185.877		484.93	199.311	0.41101	81.9188		238.13	207.346	0.870726	180.542		759.832	361.84	0.476211	172.312		1578.86	531.43	0.336591	178.875		945.53	279.747	0.295863	82.7667
577.877	327.813	0.567271	185.959		822.222	231.156	0.281136	64.9862		195.871	166.509	0.850095	141.549		807.439	341.99	0.423549	144.85		1204.83	332.413	0.275901	91.7131		1384.08	424.896	0.306988	130.438
605.335	232.022	0.383295	88.9329		561.968	224.743	0.399921	89.8795		249.403	131.461	0.527103	69.2935		624.516	347.023	0.555667	192.829		1597.19	464.51	0.29083	135.094		1016.83	406.868	0.400133	162.801
773.635	312.83	0.404364	126.497		536.487	246.738	0.459914	113.478		257.359	171.801	0.667554	114.686		746.34	298.7	0.40022	119.546		1660.19	341.56	0.205735	70.2708		895.964	389.991	0.435275	169.753
577.361	208.076	0.360392	74.9888		613.042	190.526	0.310788	59.2132		318.574	200.408	0.629078	126.072		490.223	301.545	0.615118	185.486		2299.08	568.911	0.247452	140.778		1313.04	399.765	0.304457	121.711
659.541	251.321	0.381054	95.767		612.783	235.167	0.383769	90.2498		183.052	112.937	0.616967	69.6784		934.164	334.865	0.358465	120.037		1767.87	519.812	0.294034	152.842		970.416	366.546	0.37772	138.452
634.558	294.695	0.46441	136.859		718.653	308.097	0.428715	132.086		488.791	205.125	0.419658	86.0823		657.136	306.166	0.46591	142.646		1796.58	536.585	0.298671	160.262		1189.55	348.682	0.29312	102.206
609.587	280.485	0.460123	129.058		843.426	253.715	0.300815	76.3212		301.487	154.663	0.513001	79.3422		1176.09	319.931	0.27203	87.0308		1435.87	399.357	0.278128	111.073		920.739	408.082	0.443211	180.867
587.812	339.161	0.576989	195.692		865.596	202.854	0.234352	47.5392		300.953	174.057	0.578353	100.666		732.171	285.535	0.389984	111.354		1865.71	578.822	0.310242	179.575		1358.09	405.142	0.298318	120.861
794.219	351.683	0.442804	155.726		833.432	384.786	0.461689	177.651		268.922	196.782	0.731744	143.994		775.824	282.817	0.364538	103.097		2036.31	444.083	0.218083	96.8468		1081.57	383.306	0.354399	135.843
736.26	305.071	0.414352	126.407		832.549	261.64	0.314264	82.224		283.332	169.11	0.596862	100.935		807.204	406.933	0.504127	205.146		1621.03	440.671	0.271846	119.795		1101.16	284.07	0.257973	73.2823
830.481	436.577	0.525692	229.505		954.472	265.476	0.278139	73.8393		282.282	168.267	0.596095	100.303		975.814	283.56	0.290588	82.3992		1773.07	486.836	0.274573	133.672		1174.14	543.939	0.463264	251.987
1144.34	357.253	0.312193	111.532		906.835	270.218	0.297979	80.5194		246.84	153.662	0.622517	95.6571		594.918	222.726	0.374381	83.3844		1820.75	484.678	0.266197	129.02		1116.12	450.544	0.403669	181.871
1298.56	302.317	0.23281	70.3823		569.624	258.034	0.45299	116.887		352.794	149.374	0.423403	63.2454		857.273	273.827	0.319416	87.4648		1418.6	403.847	0.28468	114.967		1176.1	316.548	0.269152	85.1994
1113.26	315.257	0.283184	89.2756		855.735	417.727	0.48815	203.913		389.965	199.544	0.511697	102.106		599.786	248.178	0.413778	102.69		1682.5	617.959	0.367285	226.967		881.368	383.288	0.434879	166.684
904.235	371.581	0.410934	152.695		1139.23	312.995	0.274742	85.9928		405.8	210.801	0.51947	109.505		806.289	357.85	0.443823	158.822		1907.8	405.721	0.212665	86.2825		1292.25	383.802	0.297003	113.99
858.559	367.566	0.42812	157.362		756.569	396.507	0.524086	207.804		359.889	148.342	0.412188	61.1448		1103.64	428.018	0.387822	165.995		2239.2	452.501	0.202082	91.4423		1248.41	513.834	0.411592	211.49
637.035	291.377	0.457396	133.275		843.279	238.31	0.282599	67.3462		380.149	133.273	0.350581	46.723		834.758	288.333	0.345409	99.5928		1607.7	519.614	0.323204	167.941		1240.77	431.386	0.347675	149.982
573.486	241.594	0.421273	101.777		576.869	236.42	0.409833	96.8927		453.971	157.516	0.346974	54.6539		1115.81	412.756	0.369916	152.685		1752.19	516.389	0.29471	152.185		771.711	261.78	0.33922	88.8011
788.772	255.833	0.324343	82.9777		486.905	194.388	0.399232	77.6059		429.596	190.21	0.442765	84.2183		819.182	321.277	0.392192	126.002		1698.27	488.896	0.28788	140.743		1101.11	443.176	0.40248	178.369
584.503	235.229	0.402443	94.6662		786.657	260.994	0.331776	86.5916		310.564	184.026	0.592554	109.045		687.81	345.06	0.501679	173.109		1862.8	528.57	0.283751	149.982		975.79	336.759	0.345114	116.22
707.05	405.69	0.573778	232.776		888.434	304.162	0.342357	104.132		367.943	211.945	0.576027	122.086		714.59	292.899	0.409884	120.055		1643.97	359.244	0.218522	78.5027		1232.96	385.8	0.312907	120.719
858.352	304.172	0.354367	107.789		895.518	321.562	0.359079	115.466		511.722	191.749	0.374713	71.8509		648.851	277.95	0.428373	119.066		2018.86	501.174	0.248247	124.415		1099.78	381.387	0.346784	132.259
601.386	299.526	0.498059	149.182		1111	230.336	0.207324	47.7541		345.944	200.378	0.579221	116.063		1011.38	302.022	0.298622	90.1906		1540.29	470.725	0.305609	143.858		1475.33	447.425	0.303271	135.691
802.344	442.411	0.551398	243.945		799.037	291.814	0.365207	106.573		344.641	189.544	0.549975	104.244		964.228	321.662	0.333595	107.305		1724.57	487.398	0.28262	137.748		1363.81	446.072	0.327078	145.9
1038.37	411.341	0.396143	162.95		912.229	269.956	0.29593	79.8881		379.758	184.114	0.484819	89.262		822.443	361.963	0.440107	159.302		2045.08	485.735	0.237513	115.369		992.463	424.532	0.427756	181.596
1146.18	418.293	0.364946	152.654		1091.62	249.165	0.228254	56.8728		220.081	190.97	0.867726	165.71		846.75	272.051	0.321288	87.4068		1716.65	369.688	0.215354	79.614		1120.29	510.875	0.456019	232.969
649.785	324.627	0.499591	162.181		1103.3	376.959	0.341666	128.794		263.984	219.022	0.829679	181.718		875.496	429.167	0.490199	210.377		1716.36	404.822	0.235861	95.4818		1357.96	358.877	0.264276	94.8426
717.26	387.211	0.539847	209.035		922.373	320.976	0.347989	111.696		293.421	176.454	0.601368	106.114		1024.03	404.426	0.394938	159.723		1698.5	549.29	0.323397	177.639		768.557	364.172	0.473839	172.559
777.504	261.778	0.33669	88.1381		1128.64	476.994	0.422625	201.59		349.482	181.151	0.518341	93.8981		704.77	273.94	0.388694	106.479		1786.52	442.577	0.247731	109.64		1174.66	367.575	0.31292	115.022
665.76	180.053	0.270447	48.6948		932.512	325.381	0.34893	113.535		354.13	182.399	0.515062	93.9468		729.987	339.201	0.464667	157.616		1684	433.054	0.257157	111.363		1263.92	321.335	0.254238	81.6954
671.094	316.444	0.471535	149.214		603.691	180.002	0.298169	53.671		413.096	229.824	0.556345	127.861		699.709	271.094	0.387438	105.032		1671.01	587.031	0.351303	206.226		965.378	418.263	0.433263	181.218
943.108	353.346	0.374661	132.385		626.077	255.527	0.40814	104.291		223.532	159.119	0.71184	113.267		678.456	245.694	0.362137	88.9749		1607.05	394.816	0.245677	96.9973		954.453	354.129	0.371028	131.392
808.678	452.369	0.559393	253.052		890.681	307.445	0.34518	106.124		475.704	211.732	0.445092	94.2402		861.551	287.097	0.333233	95.6701		1671.08	263.343	0.157588	41.4998		1348.81	407.006	0.301753	122.815
935.72	399.589	0.427039	170.64		951.094	192.452	0.202348	38.9423		356.901	230.388	0.645524	148.721		607.167	364.713	0.60068	219.076		1879.35	604.671	0.321746	194.55		1338.67	380.146	0.283973	107.951
702.878	264.531	0.376354	99.5573		708.512	328.572	0.463749	152.375		432.208	250.818	0.580318	145.554		788.311	298.408	0.378541	112.96		1905.73	437.282	0.229456	100.337		1028.45	320.334	0.311471	99.7748
492.134	248.105	0.504141	125.08		770.276	343.114	0.445443	152.838		434.083	163.255	0.376092	61.3988		988.858	397.645	0.402125	159.903		1935.39	550.581	0.28448	156.629		1111.27	418.569	0.376657	157.657
449.125	273.778	0.609581	166.89		979.988	239.274	0.24416	58.4212		331.224	248.246	0.749481	186.056		1317.9	561.837	0.426313	239.519		2128.22	632.229	0.29707	187.816		1128.95	474.709	0.420487	199.609
677.191	366.954	0.541877	198.844		737.37	323.445	0.438647	141.878		411.452	211.586	0.514242	108.806		1063.08	359.79	0.33844	121.768		1575.94	498.148	0.316096	157.463		1610.29	610.654	0.37922	231.572
1064.21	398.25	0.374221	149.033		750.126	192.668	0.256848	49.4863		441.457	204.43	0.46308	94.6675		1049.04	422.383	0.402639	170.068		1658.28	310.426	0.187198	58.1111		1314.77	527.326	0.401078	211.499
543.561	267.692	0.492478	131.833		801.104	216.365	0.270084	58.4366		332.188	242.372	0.729623	176.84		808.12	339.222	0.419767	142.394		1741.76	395.847	0.227269	89.9637		1131.64	491.803	0.434593	213.734
671.878	327.065	0.486792	159.213		818.801	238.824	0.291675	69.6591		296.084	165.471	0.558865	92.476		751.136	327.3	0.43574	142.618		1455.11	401.862	0.276173	110.983		1176.33	339.984	0.28902	98.2622
763.197	388.569	0.509133	197.833		704.368	246.196	0.349528	86.0523		388.653	161.464	0.415445	67.0794		719.81	270.258	0.375457	101.47		2189.06	526.003	0.240287	126.392		1068.34	451.804	0.422904	191.07
673.111	271.022	0.402641	109.125		646.061	199.701	0.309105	61.7287		416.675	189.603	0.455038	86.2766		811.538	433.918	0.534686	232.01		1982.57	433.118	0.218463	94.6204		1064.8	422.838	0.397104	167.911
696.008	348.631	0.500901	174.63		811.02	282.324	0.34811	98.2797		498.959	193.477	0.387761	75.0229		682.529	299.484	0.438786	131.409		2287.02	586.067	0.256258	150.184		1375	448.132	0.325914	146.052
441.627	209.183	0.473664	99.0825		440.999	230.719	0.523174	120.706		236.432	193.182	0.817072	157.844		721.571	293.176	0.406302	119.118		2079.06	443.315	0.213229	94.5275		1013.49	312.119	0.307963	96.1212
480.917	254.539	0.529278	134.722		439.146	217.046	0.494246	107.274		376.817	208.386	0.553016	115.241		694.447	296.172	0.426486	126.313		1671.03	560.918	0.335672	188.284		1021.87	446.532	0.436974	195.123
658.233	324.411	0.492851	159.886		709.475	296.96	0.418563	124.296		444.682	215.034	0.483568	103.984		900.686	357.18	0.396564	141.645		1881.92	583.527	0.31007	180.934		1146.66	396.961	0.346188	137.423
723.214	452.243	0.625324	282.798		514.46	226.821	0.440891	100.003		436.891	175.578	0.401881	70.5614		841.212	311.076	0.369795	115.034		1944.52	542.765	0.279126	151.5		1042.83	351.374	0.336942	118.393
677.086	369.842	0.546226	202.017		783.332	276.622	0.353135	97.6849		380.711	163.109	0.428433	69.8812		858.107	302.922	0.353012	106.935		1796.73	359.161	0.199897	71.7953		1195.39	302.096	0.252717	76.3448
622.644	288.803	0.463833	133.956		718.987	221.983	0.308744	68.5359		376.948	161.452	0.428314	69.1521		664.667	226.369	0.340575	77.0956		1859.21	434.44	0.233669	101.515		1494.17	414.014	0.277085	114.717
956.751	430.246	0.449695	193.479		529.275	205.89	0.389004	80.092		341.822	205.291	0.600579	123.293		889.269	441.47	0.496441	219.164		1953.24	627.48	0.321251	201.578		882.961	271.358	0.307327	83.3957
455.93	210.487	0.461665	97.1745		839.535	205.733	0.245056	50.4161		430.319	205.842	0.478347	98.464		961.617	297.444	0.309316	92.0043		2130.76	400.712	0.188061	75.3582		1237.8	446.185	0.360468	160.835
795.348	408.932	0.514155	210.254		695.666	206.67	0.297082	61.398		380.556	191.553	0.50335	96.4183		663.05	305.624	0.460937	140.873		1439.41	521.759	0.362481	189.128		1255.61	539.813	0.429921	232.077
543.084	254.467	0.468559	119.233		436.648	169.385	0.387921	65.708		460.319	225.377	0.48961	110.347		1067.77	366.762	0.343483	125.977		1814.46	519.819	0.286488	148.922		1437.47	476.626	0.331574	158.037
702.745	349.325	0.497086	173.645		468.729	205.853	0.439173	90.405		392.268	256.885	0.654871	168.227		889.823	277.986	0.312406	86.8445		1593.93	424.672	0.266431	113.146		1095.41	359.703	0.328371	118.116
649.597	322.623	0.496651	160.231		532.225	194.729	0.365877	71.2469		333.735	207.564	0.621943	129.093		887.105	326.389	0.367926	120.087		1764.98	461.048	0.26122	120.435		1054.67	398.002	0.377372	150.195
558.298	210.255	0.3766	79.182		673.144	242.671	0.360504	87.4838		505.809	221.682	0.438272	97.157		721.34	302.675	0.419601	127.003		1624.86	607.063	0.373608	226.804		912.676	338.227	0.370588	125.343
732.368	407.988	0.557081	227.282		665.926	223.955	0.336306	75.3174		332.095	161.131	0.485196	78.18		994.424	411.274	0.41358	170.095		1659.5	420.993	0.253687	106.8		1293.2	436.886	0.337834	147.595
600.99	323.938	0.539007	174.605		550.378	237.743	0.431963	102.696		320.404	193.535	0.604034	116.902		1122.13	379.65	0.338329	128.446		1443.45	407.297	0.282169	114.926		952.386	445.88	0.468172	208.748
600.039	270.613	0.450992	122.044		622.85	229.308	0.368159	84.4219		374.576	191.482	0.511197	97.885		794.955	315.486	0.39686	125.204		1930.21	555.199	0.287637	159.696		1198.37	317.528	0.264966	84.1342
529.292	257.254	0.486034	125.034		532.505	197.463	0.370819	73.223		400.219	189.313	0.473024	89.5495		551.866	272.259	0.493343	134.317		1367.37	481.914	0.352438	169.845		1576	408.206	0.259013	105.731
475.555	254.16	0.534449	135.836		489.827	205.709	0.419963	86.3901		219.203	159.581	0.728006	116.176		708.158	300.758	0.424705	127.733		1848.64	450.218	0.243541	109.646		1436.15	391.384	0.272524	106.661
611.981	433.651	0.708602	307.286		482.576	179.343	0.371637	66.6505		417.241	193.116	0.46284	89.3819		813.641	318.452	0.391391	124.639		2244.34	541.723	0.241372	130.757		1374.6	405.426	0.294941	119.577
685.528	368.005	0.53682	197.552		734.234	228.719	0.311507	71.2476		482.195	216.293	0.448559	97.0202		941.853	307.784	0.326786	100.579		1812.4	485.504	0.267879	130.057		1179.55	442.564	0.375198	166.049
826.258	423.025	0.511977	216.579		514.376	267.834	0.520697	139.46		292.895	177.481	0.605954	107.545		774.869	350.457	0.452279	158.504		1908.85	473.116	0.247854	117.263		886.181	311.289	0.35127	109.347
663.587	230.251	0.346979	79.8923		548.27	272.216	0.4965	135.155		365.663	208.518	0.570246	118.907		665.901	311.613	0.467957	145.821		1425.68	414.17	0.290507	120.319		743.547	369.705	0.497218	183.824
712.778	316.036	0.443386	140.126		576.438	389.471	0.675651	263.147		358.323	160.247	0.447214	71.6647		853.125	351.103	0.411549	144.496		1908.22	500.461	0.262266	131.254		1040.71	323.554	0.310898	100.592
765.203	317.747	0.415245	131.943		698.959	294.435	0.421248	124.03		364.093	186.808	0.513078	95.847		718.282	418.44	0.582557	243.765		2052.06	695.67	0.33901	235.839		705.323	284.78	0.403758	114.982
647.815	236.081	0.364427	86.0342		396.953	283.466	0.714105	202.424		379.121	171.621	0.452681	77.6896		930.653	290.406	0.312045	90.6199		1816.85	523.185	0.287963	150.658		895.703	305.312	0.340863	104.07
604.214	318.04	0.52637	167.407		771.549	351.387	0.455431	160.032		305.195	151.493	0.496381	75.1982		1046.44	377.001	0.360268	135.822		1512.09	474.348	0.313703	148.805		714.5	273.938	0.383398	105.027
547.944	269.077	0.491067	132.135		488.131	202.728	0.415315	84.1959		384.442	206.241	0.536468	110.642		657.914	300.6	0.456899	137.344		1779.33	454.348	0.255347	116.017		565.652	223.031	0.39429	87.9389
720.494	303.379	0.421071	127.744		761.392	294.861	0.387266	114.19		410.182	205.661	0.50139	103.116		945.6	303.255	0.320701	97.2542		1937.73	525.771	0.271333	142.659		778.673	263.585	0.338505	89.2249
912.595	380.251	0.41667	158.439		669.465	222.998	0.333099	74.2804		433.254	197.473	0.45579	90.0063		877.953	293.865	0.334716	98.3613		1775.37	516.501	0.290927	150.264		767.355	291.208	0.379496	110.512
1054.17	454.357	0.431009	195.832		701.137	169.363	0.241555	40.9104		340.373	167.325	0.491593	82.2558		734.668	308.256	0.419585	129.34		1788.43	581.117	0.324931	188.823		800.263	368.186	0.460081	169.395
552.017	316.353	0.573086	181.297		567.939	211.147	0.371778	78.4997		348.789	181.187	0.519475	94.122		989.831	344.967	0.348511	120.225		1708.52	434.222	0.254151	110.358		744.335	280.44	0.376766	105.66
803.496	397.381	0.494565	196.531		591.424	381.149	0.64446	245.635		399.688	199.792	0.49987	99.87		1145.98	412.054	0.359565	148.16		2131.77	592.515	0.277945	164.687		952.737	312.257	0.327747	102.341
799.397	379.032	0.474147	179.717		827.973	288.215	0.348097	100.327		497.183	137.835	0.277232	38.2123		740.351	453.44	0.612466	277.717		1874.16	480.773	0.256527	123.331		717.437	290.078	0.404325	117.286
540.828	313.017	0.578774	181.166		740.468	266.001	0.359234	95.5565		324.705	178.591	0.55001	98.2268		879.485	293.589	0.333819	98.0057		1857.62	621.069	0.334337	207.646		656.106	220.367	0.335871	74.0149
625.126	321.948	0.515013	165.807		603.528	325.058	0.538596	175.075		334.664	200.755	0.59987	120.427		1008.3	277.048	0.274767	76.1235		2498.48	689.037	0.275782	190.024		1476.48	528.841	0.358176	189.418
623.755	258.456	0.414355	107.093		613.295	186.847	0.304661	56.925		214.607	132.428	0.617072	81.7176		580.46	227.843	0.392521	89.4333		1498.5	549.836	0.366924	201.748		818.061	424.076	0.518392	219.837
549.301	306.013	0.557095	170.478		596.801	235.67	0.394889	93.0634		207.217	134.001	0.64667	86.6544		624.898	348.074	0.557009	193.88		2428.29	574.17	0.23645	135.763		1011.09	333.822	0.330161	110.215
653.27	372.456	0.570141	212.352		813.084	268.435	0.330144	88.6223		393.05	168.74	0.429309	72.4416		920.232	331.333	0.360054	119.298		1866.17	405.213	0.217136	87.9862		767.968	230.643	0.300329	69.2688
976.625	317.577	0.325178	103.269		878.622	368.24	0.419111	154.333		483.461	167.934	0.347358	58.3332		727.466	244.027	0.335448	81.8584		1855.06	524.437	0.282706	148.262		798.081	259.85	0.325594	84.6055
1109.64	393.695	0.354795	139.681		696.265	310.15	0.445448	138.156		374.73	175.91	0.469431	82.5777		451.908	215.558	0.476995	102.82		1806.6	516.802	0.286063	147.838		614.956	228.77	0.37201	85.1048
709.674	288.76	0.406891	117.494		1139.22	216.641	0.190166	41.1977		348.275	171.621	0.492774	84.5704		676.395	165.963	0.245364	40.7213		2341.86	642.312	0.274275	176.17		1429.25	546.887	0.382639	209.26
505.24	242.804	0.480572	116.685		1009.57	266.292	0.263768	70.2393		463.127	168.065	0.362892	60.9894		478.357	160.178	0.33485	53.6357		2086.78	605.097	0.289966	175.458		841.012	345.519	0.410837	141.952
861.986	369.221	0.428338	158.151		712.858	343.661	0.482089	165.675		266.382	183.483	0.688797	126.382		397.591	216.657	0.544924	118.062		1468.34	549.977	0.374558	205.998		893.096	276.333	0.30941	85.5002
719.229	373.667	0.519538	194.134		617.409	235.116	0.380811	89.5347		380.002	183.027	0.481647	88.1545		548.465	170.631	0.311106	53.0844		1681.21	386.925	0.230147	89.0497		951.756	354.232	0.372188	131.841
779.82	338.816	0.43448	147.209		696.378	212.736	0.305489	64.9886		516.598	207.444	0.401558	83.3008		401.385	176.227	0.439047	77.372		1997.62	489.575	0.24508	119.985		1492.2	413.749	0.277275	114.722
601.979	314.365	0.522219	164.167		646.344	373.637	0.578078	215.991		573.478	200.047	0.348831	69.7826		428.511	212.746	0.496477	105.624		1830.73	417.598	0.228104	95.2559		964.416	332.171	0.344427	114.409
886.387	497.87	0.561685	279.646		766.02	195.352	0.255022	49.8191		374.774	213.592	0.569922	121.731		400.627	214.927	0.536477	115.303		1674.35	438.168	0.261695	114.666		1534.25	510.324	0.332622	169.745
841.702	359.062	0.42659	153.172		672.754	289.256	0.429958	124.368		386.254	194.536	0.503648	97.9776		487.758	182.157	0.373458	68.0279		2164.34	580.167	0.268057	155.518		1440.71	429.148	0.297872	127.831
474.253	328.899	0.69351	228.095		723.447	195.448	0.270162	52.8027		324.302	228.62	0.70496	161.168		499.407	178.579	0.357582	63.8567		1536.45	409.32	0.266406	109.045		972.113	428.971	0.441277	189.295
588.265	232.36	0.394992	91.7804		668.026	298.008	0.446102	132.942		424.86	137.06	0.3226	44.2156		508.428	250.349	0.492398	123.271		1837.75	531.153	0.289023	153.516		1534.71	393.378	0.256321	100.831
1138.44	350.862	0.308195	108.134							251.13	213.379	0.849675	181.303		727.938	227.865	0.313028	71.3281		1946.99	424.77	0.218167	92.6709		1059.67	333.614	0.314829	105.031
757.107	477.204	0.630299	300.781							332.148	138.936	0.418295	58.1163		399.669	187.363	0.468795	87.8349		1537.73	481.359	0.313032	150.681		1181.98	362.881	0.307011	111.409
682.715	379.4	0.555722	210.841							418.008	265.47	0.635084	168.596		277.428	120.111	0.432945	52.0014		1834.57	482.078	0.262774	126.678		1212.86	309.791	0.255422	79.1275
682.715	379.4	0.555722	210.841							338.681	150.706	0.444979	67.061		1095.74	269.975	0.246385	66.5178		1656.24	496.224	0.299609	148.673		1144.18	424.549	0.37105	157.529
714.468	262.632	0.367591	96.5412							450.246	235.345	0.522703	123.016		511.75	260.94	0.509897	133.053		1747.75	470.686	0.26931	126.76		1119.26	323.821	0.289317	93.687
720.313	392.022	0.544238	213.353							208.107	191.634	0.920844	176.465		434.296	189.353	0.436	82.5579		2010.89	530.799	0.263962	140.111		1297.78	330.569	0.254719	84.2021
629.17	314.934	0.500555	157.642							259.459	193.053	0.74406	143.643		647.325	185.763	0.28697	53.3084		1340.07	414.839	0.309566	128.42		1335.02	397.577	0.297805	118.4
799.996	354.776	0.443472	157.333							237.868	186.752	0.785108	146.62		506.482	165.137	0.326047	53.8424		2038.81	604.927	0.296706	179.486		1360.35	444.141	0.326491	145.008
1176.51	377.696	0.321031	121.252							252.45	181.427	0.718665	130.385		367.764	144.832	0.393818	57.0374		1875.6	593.298	0.316325	187.675		1297.44	439.583	0.338807	148.934
1008.35	429.239	0.425686	182.721							350.757	231.909	0.661167	153.331		453.455	150.863	0.332697	50.1916		1772.3	407.568	0.229965	93.7266		1364.25	378.051	0.277112	104.762
788.482	318.865	0.404404	128.95							504.298	180.977	0.358869	64.9471		404.598	170.974	0.422577	72.2498		1660.3	546.927	0.329414	180.165		1588.54	531.38	0.334508	177.751
867.385	347.669	0.400824	139.354							431.537	184.277	0.427025	78.6908		457.703	127.887	0.27941	35.733		1947.43	385.584	0.197997	76.3443		1258.59	357.541	0.284081	101.571
1126.42	378.526	0.336044	127.202							427.639	253.71	0.593281	150.521		336.573	155.406	0.46173	71.7557		1241.62	259.909	0.209331	54.407		1182.5	481.366	0.407076	195.952
647.637	302.177	0.466584	140.991							275.074	214.716	0.780575	167.602		376.558	130.228	0.345838	45.0378		1371.97	291.419	0.21241	61.9002		1801.44	504.357	0.279974	141.207
729.441	327.555	0.449049	147.088							428.986	162.994	0.379952	61.9299		613.302	149.301	0.243438	36.3455		1265.24	399.362	0.315641	126.055		1381.41	508.85	0.368354	187.437
712.481	281.174	0.394641	110.963							405.333	294.794	0.727288	214.4		446.325	120.019	0.268905	32.2737		864.618	270.004	0.312281	84.3172		1130.98	375.867	0.332339	124.915
833.723	403.144	0.483547	194.939							400.083	171.091	0.427639	73.1651		477.968	130.649	0.273343	35.7119		1108.53	535.684	0.483239	258.863		1267.28	554.853	0.437828	242.93
716.874	398.892	0.556433	221.956							381.74	205.528	0.538398	110.656		439.856	133.222	0.302876	40.3498		1129.38	392.697	0.347712	136.545		905.183	319.118	0.352545	112.504
825.083	415.509	0.503597	209.249							402.514	261.698	0.650159	170.145		272.378	171.334	0.62903	107.774		1188.3	480.638	0.404474	194.406		1111.47	409.724	0.368634	151.038
765.269	296.255	0.387125	114.688							314.979	201.435	0.639519	128.821		1017.3	438.904	0.431441	189.361		1541.17	391.681	0.254144	99.5435		947.702	248.193	0.261889	64.9991
577.602	392.716	0.679908	267.011							338.791	180.875	0.533884	96.5662		1162.54	481.752	0.414395	199.636		1399.38	488.842	0.349328	170.766		774.033	245.799	0.317556	78.055
665.442	339.564	0.510283	173.274							241.864	147.34	0.609185	89.7574		1135.4	452.695	0.398709	180.494		1512.44	389.463	0.257506	100.289		729.391	276.384	0.378924	104.729
1036.43	415.049	0.400461	166.211							551.836	184.22	0.333831	61.4984		936.172	240.419	0.256811	61.7422		1402.84	397.472	0.283334	112.617		1014.8	311.613	0.307067	95.6862
887.718	372.194	0.419271	156.05							441.528	177.438	0.401873	71.3075		1053.16	369.689	0.351028	129.771		1482.07	417.283	0.281555	117.488		883.649	323.137	0.365685	118.166
703.492	272.484	0.387331	105.541							459.689	251.354	0.546791	137.438		1561.78	460.989	0.295169	136.07		1795.26	475.358	0.264786	125.868		848.112	312.437	0.368391	115.099
719.633	330.31	0.458998	151.612							559.254	253.94	0.454069	115.306		1282.35	625.164	0.487515	304.777		1344.33	430.363	0.320132	137.773		1004.55	418.3	0.416404	174.182
504.915	313.121	0.620146	194.181							507.658	207.493	0.408726	84.8078		1218.06	399.906	0.328313	131.294		1588.7	592.819	0.373146	221.208		906.982	426.952	0.470739	200.983
729.241	272.105	0.373135	101.532							327.517	194.048	0.592482	114.97		938.304	372.14	0.396609	147.594		1732.61	423.413	0.244379	103.473		885.994	299.997	0.338599	101.579
544.475	321.826	0.591076	190.224							468.871	234.282	0.499673	117.064		750.078	333.966	0.445242	148.696		1282.4	338.738	0.264143	89.4754		859.57	283.599	0.329931	93.5682
844.019	368.009	0.43602	160.459							351.507	210.248	0.598133	125.756		723.389	354.102	0.489504	173.334		1727.14	491.708	0.284695	139.987		747.432	326.099	0.436293	142.275
754.477	266.856	0.353697	94.3861							426.35	209.541	0.491476	102.984		842.525	370.649	0.439926	163.058		1390.32	393.793	0.283239	111.537		1180.31	353.123	0.299179	105.647
548.332	373.514	0.681182	254.431							497.293	241.385	0.485398	117.168		1040.72	362.73	0.348538	126.425		1070.68	217.619	0.203252	44.2315		1068.92	435.062	0.40701	177.074
840.835	388.307	0.461811	179.325							352.063	234.321	0.665566	155.956		758.904	309.052	0.407235	125.857		1224.98	420.925	0.343618	144.637		814.242	231.528	0.284348	65.8345
871.001	288.796	0.331568	95.7555							295.671	247.088	0.835686	206.488		670.426	242.94	0.362367	88.0333		952.025	274.189	0.288006	78.9681		894.208	328.927	0.367842	120.993
1058.73	436.828	0.412596	180.233							284.416	198.317	0.697278	138.282		1110.24	321.587	0.289655	93.1493		971.177	338.013	0.348045	117.644		1019.34	348.06	0.341455	118.847
998.382	311.649	0.312154	97.2825							534.328	252.088	0.471785	118.931		700.702	310.806	0.443564	137.862		831.143	292.374	0.351773	102.849		1210.09	297.886	0.246168	73.33
361.38	326.202	0.902656	294.448							413.59	238.222	0.575986	137.213		620.704	429.841	0.692506	297.667		1177.52	287.131	0.243844	70.0152		1221.37	417.85	0.342116	142.953
918.841	305.746	0.332752	101.738							421.266	179.005	0.424922	76.0631		1120.41	444.211	0.396472	176.117		945.881	273.941	0.289615	79.3373		1067.91	449.071	0.420514	188.841
556.88	283.647	0.50935	144.476							412.378	208.595	0.505834	105.515		922.382	363.13	0.393687	142.96		1072.84	332.843	0.310245	103.263		882.367	411.326	0.466162	191.745
610.856	298.4	0.488495	145.767							413.148	187.36	0.453494	84.9666							775.987	372.749	0.480355	179.052		1259.51	387.875	0.307957	119.449
783.722	317.897	0.405625	128.947							461.43	237.915	0.515604	122.67							1270.64	306.86	0.2415	74.1067		1207.79	394.969	0.327017	129.162
886.48	339.522	0.383	130.037							239.694	174.655	0.728658	127.264							878.839	273.358	0.311044	85.0265		1358.95	451.832	0.332485	150.227
631.012	285.611	0.452624	129.274							344.478	235.227	0.682851	160.625							913.175	277.947	0.304374	84.5999		1160.58	354.69	0.305616	108.399
867.789	302.392	0.348463	105.372							241.876	185.936	0.768724	142.934							845.731	362.797	0.428974	155.631		1235.92	458.802	0.371222	170.317
521.005	360.017	0.691005	248.774							205.401	130.604	0.635849	83.0444							845.402	298.32	0.352874	105.269		1282.28	514.392	0.401154	206.351
605.043	304.172	0.502728	152.916							397.01	162.348	0.408927	66.3884							994.784	283.299	0.284784	80.6791		1416.68	416.841	0.294237	122.65
626.276	358.476	0.572393	205.189							286.185	199.906	0.69852	139.638							897.792	366.381	0.408091	149.517		1316.67	314.507	0.238866	75.1249
695.404	380.042	0.546505	207.695							160.661	113.623	0.707222	80.3567							1067.45	300.56	0.281568	84.6281		927.843	270.732	0.291786	78.9959
1392.26	338.515	0.24314	82.3065							169.667	118.64	0.699252	82.9593							969.9	215.451	0.222137	47.8597		1326.14	416.872	0.314351	131.044
944.418	469.559	0.497194	233.462							221.289	153.261	0.692583	106.146							940.347	199.475	0.212129	42.3145		1137.38	351.281	0.308852	108.494
1519.65	626.212	0.412076	258.047							325.385	189.879	0.583552	110.804							1039.19	312.207	0.300434	93.7976		1107.88	322.028	0.290669	93.6036
1188.74	300.729	0.25298	76.0785							272.794	136.097	0.4989	67.8988							1112.78	267.376	0.240278	64.2444		1094.59	397.828	0.363449	144.59
943.728	319.27	0.338307	108.011							305.6	179.529	0.587464	105.467							1144.42	321.526	0.280951	90.3331		1680.31	485.342	0.288841	140.187
918.143	361.381	0.3936	142.24							281.075	133.218	0.473959	63.1399							1221.24	356.32	0.291769	103.963		922.161	265.902	0.288347	76.6719
974.404	411.172	0.421973	173.503							267.447	186.603	0.69772	130.197							1021.12	305.6	0.29928	91.4598		943.954	330.216	0.349822	115.517
638.126	362.144	0.567512	205.521							290.932	154.776	0.532001	82.3409							1582.09	466.495	0.29486	137.551		1163.28	343.863	0.295597	101.645
839.227	436.229	0.519799	226.751							257.346	166.626	0.647478	107.887							1688.85	439.486	0.260228	114.367		1175.54	381.664	0.324671	123.915
629.043	487.693	0.775294	378.105							256.992	203.575	0.792145	161.261							1421.84	494.604	0.347862	172.054		994.699	404.329	0.406484	164.353
927.692	400.81	0.432051	173.17							335.151	177.721	0.530271	94.2404							1571.22	429.29	0.27322	117.291		1415.69	398.346	0.281379	112.086
798.347	442.322	0.554047	245.067							243.042	148.891	0.612614	91.2128							2037.34	548.091	0.269022	147.449		1044.29	332.294	0.318202	105.737
1013.4	350.69	0.346053	121.357							375.584	281.455	0.74938	210.917							1925.29	560.624	0.29119	163.248		1200.84	328.275	0.273371	89.7408
727.87	267.176	0.367066	98.0711							356.592	219.824	0.616458	135.512							1849.35	431.838	0.233508	100.838		1211.74	330.382	0.27265	90.0787
714.128	316.607	0.443348	140.367							285.057	206.237	0.723494	149.211							1698.45	466.633	0.27474	128.203		1256.22	389.661	0.310185	120.867
668.598	235.186	0.35176	82.729							296.434	235.816	0.795509	187.594							1662.69	514.787	0.30961	159.383		831.964	316.514	0.380442	120.415
810.014	262.574	0.32416	85.1159							258.904	199.03	0.768741	153.002							1827.33	423.147	0.231565	97.9862		1128.06	304.477	0.269913	82.1822
656.859	323.117	0.491912	158.945							282.995	177.319	0.62658	111.105							1598.91	490.988	0.307077	150.771		1317.36	381.924	0.289917	110.726
565.437	278.247	0.492092	136.923							357.862	245.583	0.686251	168.531							2220.32	608.381	0.274006	166.7
688.885	279.581	0.405846	113.467							336.774	203.194	0.603354	122.598							1900.42	387.185	0.203737	78.8839
523.106	296.251	0.566331	167.776							424.643	177.554	0.418125	74.2398							1999.41	471.724	0.235932	111.295
742.689	307.873	0.414538	127.625							251.264	139.974	0.557079	77.9766							1685.18	440.549	0.261425	115.171
615.198	324.087	0.526801	170.729							311.114	158.168	0.508392	80.4114							2083.67	456.514	0.219091	100.018
774.466	370.852	0.478849	177.582							261.221	214.691	0.821875	176.449							1865.67	458.623	0.245822	112.74
768.79	345.041	0.44881	154.858							286.709	247.782	0.864228	214.14							1730.78	481.216	0.278034	133.794
879.879	361.039	0.410328	148.144							465.061	213.027	0.458062	97.5797							1930.62	560.397	0.290268	162.665
596.072	344.146	0.577356	198.695							397.359	195.928	0.493076	96.6073							1703.71	578.387	0.339487	196.355
718.597	227.17	0.31613	71.8152							365.002	180.766	0.495247	89.5237							1916.08	499.795	0.260842	130.368
491.06	265.247	0.540152	143.274							369.511	172.389	0.466533	80.4251							1812.02	482.609	0.266337	128.537
																				1585.31	644.156	0.406329	261.739
																				1736.04	563.995	0.324875	183.228
																				1862.36	512.791	0.275345	141.194
																				2063.11	568.765	0.275683	156.799
																				1851.59	542.687	0.293093	159.058

## Sheet: Control Proteins
Cbf1-GFP (-met)					Reb1-GFP (-met)					Sth1-GFP (-met)					Free GFP
Average GFP Intensity	Std Dev.	CV	Fano		Average GFP Intensity	Std Dev.	CV	Fano		Average GFP Intensity	Std Dev.	CV	Fano		Average GFP Intensity	Std Dev.	CV	Fano
5623.31	764.227	0.135903	103.861		5623.31	764.227	0.135903	103.861		4180.07	399.049	0.0954647	38.0951		1822.82	349.803	0.191902	67.1278
3598.25	576.623	0.160251	92.4044		3034.43	670.272	0.220889	148.056		4295.23	757.644	0.176392	133.642		4102.19	641.628	0.156411	100.358
4407.05	836.886	0.189897	158.922		3704.12	619.936	0.167364	103.755		3731.35	428.972	0.114964	49.3165		2754.41	356.391	0.129389	46.1132
3330.22	590.483	0.177311	104.699		4087	807.118	0.197484	159.393		4461.43	666.884	0.149478	99.6843		3879.83	562.483	0.144976	81.5466
4606.61	819.776	0.177956	145.884		4430.84	821.811	0.185475	152.425		5146.18	752.698	0.146263	110.092		3518.59	484.926	0.137818	66.8316
3478.13	516.802	0.148586	76.7896		4130.09	538.655	0.130422	70.2525		5283.49	771.204	0.145965	112.569		2688.98	360.127	0.133927	48.2308
5882.93	768.384	0.130612	100.36		4845.02	866.349	0.178812	154.914		4483.58	769.138	0.171546	131.942		2634.39	513.727	0.195008	100.181
3878.26	935.325	0.241171	225.574		4371.06	736.996	0.168608	124.264		5317.47	915.218	0.172115	157.523		1594.16	252.106	0.158143	39.8688
4630.81	724.517	0.156456	113.355		3976.17	721.383	0.181426	130.878		4051.04	637.731	0.157424	100.394		997.366	205.116	0.205658	42.1837
4757.65	825.501	0.17351	143.233		4024.43	740.644	0.184037	136.306		5141.31	909.713	0.176942	160.966		4797.57	846.732	0.176492	149.441
3169.17	525.566	0.165837	87.1583		4021.37	760.067	0.189007	143.658		5492.14	959.288	0.174666	167.555		4324.22	633.349	0.146466	92.7639
3012.69	648.711	0.215326	139.684		4509.95	686.424	0.152202	104.475		4627.57	891.12	0.192567	171.601		2169.46	452.738	0.208687	94.4803
2914.42	545.502	0.187173	102.103		4499.36	872.451	0.193905	169.173		4345.47	790.312	0.181871	143.734		769.87	160.551	0.208543	33.4818
3299.01	715.013	0.216735	154.969		5381.15	790.65	0.14693	116.17		3487.47	782.542	0.224387	175.592		1565.84	261.014	0.166692	43.509
6456.53	746.031	0.115547	86.2015		5466.52	1051.61	0.192373	202.301		3887.84	734.052	0.188807	138.594		2657.03	323.201	0.12164	39.3142
5858.09	869.405	0.148411	129.029		3974.98	598.861	0.150658	90.223		5001.84	783.283	0.156599	122.661		1242.65	217.19	0.17478	37.9604
3879.69	587.777	0.151501	89.0487		4496.06	778.49	0.173149	134.795		4759.53	1000.69	0.21025	210.395		879.152	196.983	0.22406	44.1361
2268.29	489.345	0.215733	105.568		3161.52	704.669	0.222889	157.063		6150.58	1164.89	0.189395	220.624		2166.36	371.259	0.171374	63.6243
3586.2	693.918	0.193497	134.271		4739.49	624.765	0.131821	82.3572		3558.78	686.784	0.192983	132.538		1259.78	264.15	0.209679	55.3868
3712.26	790.324	0.212895	168.256		3779.62	813.493	0.215231	175.089		4601.85	878.761	0.190958	167.807		3015.11	543.962	0.180412	98.1371
2483.94	690.747	0.278085	192.087		4637.63	869.675	0.187526	163.086		4313.04	635.144	0.147261	93.5322		1322.81	211.196	0.159657	33.7189
4547.62	999.04	0.219684	219.473		4022.01	668.539	0.16622	111.124		4046.98	556.182	0.137431	76.4369		1807.93	347.223	0.192056	66.6862
3401.36	460.434	0.135368	62.3279		4835.94	813.22	0.168162	136.753		4882.65	829.173	0.16982	140.81		1034.26	211.941	0.204921	43.4313
3189.94	564.107	0.176839	99.7562		4025.61	714.577	0.177508	126.843		5096.89	901.75	0.176922	159.539		2345.49	407.879	0.173899	70.9298
5645.33	1023.81	0.181355	185.673		4505.2	690.919	0.15336	105.96		5347.5	878.838	0.164346	144.433		2660.33	657.953	0.24732	162.725
3247.33	548.843	0.169013	92.7618		5477.8	932.322	0.1702	158.681		5108.41	810.541	0.158668	128.607		2726.56	418.939	0.153651	64.3704
5558	874.294	0.157304	137.53		3208.66	701.959	0.21877	153.568		5248.31	761.424	0.14508	110.467		2372.89	364.701	0.153695	56.0527
4098.05	758.965	0.185201	140.561		4631.62	639.624	0.138099	88.3316		3800.13	655.842	0.172584	113.188		2581.86	405.216	0.156947	63.5976
2502.97	680.5	0.271876	185.012		4573.27	566.917	0.123963	70.2767		4146.63	593.702	0.143177	85.0045		4111.45	515.5	0.125381	64.6341
4439.62	768.932	0.173198	133.177		3811.7	868.071	0.227739	197.693		5181.03	910.598	0.175756	160.043		3677.77	684.207	0.186038	127.289
3059.16	441.995	0.144482	63.8605		4838.04	813.273	0.1681	136.711		4350.38	821.612	0.18886	155.169		2546.33	500.738	0.196651	98.4704
2961.67	532.261	0.179716	95.656		3685.57	584.571	0.158611	92.7191		5650.32	898.5	0.159017	142.877		1633.65	270.006	0.165278	44.626
4887.84	619.645	0.126773	78.554		4578.15	892.07	0.194854	173.823		5406.35	883.246	0.163372	144.298		2776.91	338.091	0.121751	41.1629
2194.37	593.126	0.270294	160.318		5207.15	869.131	0.166911	145.068		6213.36	962.975	0.154985	149.246		2731.42	408.405	0.149521	61.0652
3697.47	787.087	0.212872	167.549		3848.06	655.066	0.170233	111.514		3792.92	746.319	0.196766	146.85		2085.84	422.084	0.202357	85.4115
5579.05	932.601	0.167161	155.895		4322.47	861.438	0.199293	171.679		4466.09	928.797	0.207966	193.159		1957.01	283.297	0.14476	41.0101
2692.27	504.304	0.187315	94.4639		4734.72	877.422	0.185316	162.601		4562.18	704.793	0.154486	108.881		1387.66	309.14	0.222778	68.8697
3153.07	790.901	0.250835	198.386		4785.65	779.285	0.162838	126.897		4927.95	806.038	0.163565	131.839		1086.28	247.713	0.228037	56.4877
5780.93	946.941	0.163804	155.113		3848.31	749.718	0.194818	146.058		3695.96	636.106	0.172108	109.479		1285.13	243.542	0.189507	46.1529
2741.77	628.985	0.229408	144.294		4663.05	757.337	0.162412	123.001		3878.49	769.735	0.198462	152.763		745.206	177.832	0.238635	42.4369
3491.89	583.739	0.16717	97.5837		4591.8	678.526	0.147769	100.265		4685.73	640.45	0.136681	87.5374		683.02	162.438	0.237823	38.6315
4046.59	610.369	0.150835	92.0653		4406.45	739.177	0.167749	123.996		4221.55	637.542	0.151021	96.2821		741.787	159.772	0.215388	34.413
4233.26	868.346	0.205124	178.119		4581.08	711.524	0.155318	110.512		3704.36	695.838	0.187843	130.708		827.103	166.977	0.201882	33.7096
2006.06	450.825	0.224732	101.315		5231.17	764.187	0.146083	111.635		3590.67	708.245	0.197246	139.699		878.332	256.059	0.291529	74.6486
6500.47	752.447	0.115753	87.0978		3557.01	669.227	0.188143	125.911		4024.1	745.572	0.185277	138.137		1018.34	254.178	0.249601	63.443
3676.35	614.646	0.167189	102.762		3347.31	693.206	0.207094	143.558		3819.99	766.134	0.200559	153.655		642.165	173.932	0.270853	47.1099
					3980.09	788.759	0.198176	156.313		4616.06	798.81	0.17305	138.234		1294.32	251.265	0.194129	48.7777
					3856.18	729.05	0.18906	137.834		4734.59	824.928	0.174234	143.731		349.326	150.781	0.431634	65.0822
					5118.43	739.677	0.144513	106.893		4094.61	739.552	0.180616	133.575		502.129	149.878	0.298485	44.7363
										4351.93	986.679	0.226722	223.702		632.364	219.732	0.347477	76.3518
										3915.24	733.665	0.187387	137.479		1114.92	283.591	0.25436	72.1343
										3874.23	691.008	0.17836	123.248		912.018	230.403	0.25263	58.2067
										3398.14	639.167	0.188093	120.223		2368.15	391.304	0.165236	64.6577
										3172.72	580.371	0.182925	106.165		2440.84	322.408	0.132089	42.5864
										4184.5	861.686	0.205923	177.441		1194.46	232.384	0.194552	45.2107
										5549.36	946.358	0.170535	161.387		923.901	265.26	0.287109	76.1584
										4827.99	874.809	0.181195	158.511		870.082	203.799	0.23423	47.7358
										4181.46	822.267	0.196646	161.695		1067.61	192.424	0.180239	34.6823
										4326.27	548.928	0.126883	69.6494		1320.49	208.913	0.158208	33.0518
															731.052	170.87	0.233732	39.9377
															609.522	152.067	0.249486	37.9385
															747.095	181.395	0.2428	44.0428
															348.404	114.454	0.328509	37.5992
															915.326	238.122	0.26015	61.9474
															2153.99	379.808	0.176327	66.9706
															2579.6	329.547	0.127751	42.1
															2736.43	434.099	0.158637	68.8641
