# Supplementary material for: Transcription factor condensates, 3D clustering, and gene expression enhancement of the MET regulon
Source: eLife. 2024 Sep 30;13:RP96028. doi: 10.7554/eLife.96028 (PMC11441978; doi:10.7554/eLife.96028)
Supplement: Supplementary file 3. [file elife-96028-supp3.xlsx]

## Sheet: Peaks Bound by All Met TFs
Chromosome	Start	End	Nearest MET gene	Peak Distance (bps)
chrI	130391	130807	CYS3	416
chrII	650041	650294	MET8	253
chrIV	344992	345283	RAD59	291
chrIV	964790	965063	MET32	273
chrIV	1454636	1454889	SAM2	253
chrIX	268293	268648	MET30	355
chrIX	384177	384547	MET28	370
chrV	13293	13633	RMD6	340
chrV	258135	258357	HOM3	222
chrV	342526	342843	MET6	317
chrVI	212854	213285	MET10	431
chrVII	271720	272169	MET13	449
chrVII	797998	798286	CYS4	288
chrVII	905550	905850	ADE3	300
chrVIII	25907	26221	MUP3	314
chrX	236575	236849	GSH1	274
chrX	322966	323489	BNA3	523
chrX	683403	683762	MET5	359
chrX	690558	690920	HOM6	362
chrXI	67580	67894	MNN4	314
chrXI	308730	309010	YKG9, NUP100	280
chrXI	439491	439765	MET14	274
chrXI	571240	571469	MET1	229
chrXII	323005	323473	SUL2	468
chrXII	732100	732372	MET17	272
chrXIV	116383	117643	MET2	1260
chrXV	159333	159582	ADH1	249
chrXVI	74947	75231	ATG41	284
chrXVI	877490	878131	MET16	641
chrVII	598759	599312	MUP1	553
chrVII	156227	156563	STR3	336
chrII	258079	258294	IPP1	215
chrXIV	198602	198965	ZWF1	363
chrXIV	233756	234020	POP1, ADE12	264

## Sheet: Peaks Bound by Met4, Cbf1
Chromosome	Start	End	Nearest MET gene	Peak Distance (bps)
chrIV	449452	450044	RMD1	592
chrIX	222564	223028	SER33	464
chrV	69091	69428	IES6	337
chrVIII	335867	336167	YHR112C	300
chrX	160044	160380	MRS3	336
chrX	455723	456034	MET3	311
chrXI	408082	408455	ATP7, PUT3	373
chrXIII	236094	236538	YML018C, PSP2	444
chrXIII	267925	268265	YPT7, CDC5	340
chrXIV	559209	559676	IDH1, NCE103	467
chrXV	207137	207476	MET22	339

## Sheet: Peaks Bound by Cbf1 Only
Chromosome	Start	End	Nearest gene	Distance (bps)
chrI	119623	119892	LDS1, PSK1	269
chrI	150986	151869	NUP60	883
chrII	237895	238752	ECM15	857
chrII	315178	315547	ATP3	369
chrII	336887	337287	REB1	400
chrII	426903	427453	NHP6B,TIM12	550
chrII	668571	668994	PCS60	423
chrII	718209	718817	ARO4,SPO23	608
chrIII	113974	114765	YCR001W	791
chrIII	264710	264985	YCR087C,ABP1	275
chrIII	310203	310392	RDS2	189
chrIV	326102	326687	BRE1,AHK1	585
chrIV	416824	417374	RPN4	550
chrIV	562621	563173	CDC34,PST1	552
chrIV	573763	574273	YDR061W, MAK21	510
chrIV	681765	682338	PDS1, MRX14	573
chrIV	739989	740364	DOP1	375
chrIV	842080	842271	RVB1, HST4	191
chrIV	1266297	1266880	SXM1, UPT5	583
chrIV	1279989	1280239	PDR15	250
chrIV	1337736	1338214	THI74	478
chrIV	1468991	1469378	SMT3	387
chrIX	21325	22008	CSS1	683
chrIX	117545	118619	STH1, MET18	1074
chrIX	139018	139375	RPI1, RHO3	357
chrIX	142202	142701	PRM5, HIS5	499
chrIX	165991	166369	PFK26, MOB1	378
chrIX	292168	292453	BCY1,ULP2	285
chrV	70176	70498	YEL043W	322
chrV	106705	107250	RIP1	545
chrV	151612	152771	IRC22, MNN1	1159
chrV	191861	192188	AFG3, ISC1	327
chrV	237113	237736	SAH1	623
chrV	260039	260446	PIC2	407
chrV	276076	276555	FCY22	479
chrV	307051	307927	YOS1	876
chrV	359013	359401	PRS2, UBC6	388
chrV	375021	375383	GLE2	362
chrV	386750	387232	LSM4	482
chrV	394039	394287	BOI2, SPR6	248
chrV	409254	409772	DSE1, RSP5	518
chrVI	74612	75105	RIM15	493
chrVI	90072	90556	EPL1, BUD27	484
chrVI	103037	103776	LPD1	739
chrVI	184506	185077	FAB1	571
chrVI	224829	225188	QCR6	359
chrVI	248044	248425	RMD8, YMR31	381
chrVII	27548	27825	RTG2	277
chrVII	496836	497310	ERG26	474
chrVII	591308	592054	SCM4	746
chrVII	609518	610033	ERG25	515
chrVII	719227	719871	SPT6	644
chrVII	750865	751315	SYF2, YGR130C	450
chrVII	942114	942646	HSV2. AZR1	532
chrVII	951250	951632	SMI1, BNS1	382
chrVIII	98388	98991	STE20, MRP4	603
chrVIII	107283	107983	OSH7, QCR10	700
chrVIII	174608	174953	ERC1, YHR033W	345
chrVIII	283267	283800	GAR1, YNG2	533
chrVIII	302353	302837	SFB3, TRA1	484
chrVIII	375270	375629	SPL2, ARO9	359
chrX	37704	37925	CBP1	221
chrX	79481	79935	SWE1, MNN5	454
chrX	104448	105028	SET2, ERG20	580
chrX	123267	123637	CIS3, FAR1	370
chrX	195224	195633	NCA3, ASF1	409
chrX	436066	436727	AVT1	661
chrX	608819	609274	SFC1	455
chrXI	80557	81000	ACP1, DPH2	443
chrXI	182525	182708	CTK1	183
chrXI	428821	429466	LAC1, CAP1	645
chrXII	29123	29567	YCT1	444
chrXII	130756	131260	PSR1	504
chrXII	289401	289979	GAL2	578
chrXII	424280	424713	PUT1	433
chrXII	704490	705009	YLR283W	519
chrXIII	30097	30591	NDI1	494
chrXIII	41148	41394	TAF8	246
chrXIII	511614	512140	YMR112, PKR1	526
chrXIII	777680	777981	GFP1	301
chrXIII	892117	892403	PSE1	286
chrXIV	107138	107575	WSC2, POP3	437
chrXIV	446964	447365	YNL095C, APP1	401
chrXIV	507222	507795	YDJ1, MTQ1	573
chrXIV	628434	629100	DOM34, CIT1	666
chrXIV	719023	719474	BRE5, POP2	451
chrXV	27145	27881	HPF1	736
chrXV	109406	109688	MDY2, ZEO1	282
chrXV	128678	128975	IZH4, PHK2	297
chrXV	232519	232923	SPE2	404
chrXV	326448	327033	RPP6	585
chrXV	329604	330064	ALG6	460
chrXV	405002	405556	HIR2, CKB2	554
chrXV	446682	447105	YNG1, CYT1	423
chrXV	511172	511682	NUP1, KTR1	510
chrXV	579324	579654	IDH2	330
chrXV	877940	878420	MBF1, BUD7	480
chrXV	931264	931502	SNC2, PDR10	238
chrXV	1044188	1044681	GDH1	493
chrXV	1045640	1045956	ATF1	316
chrXVI	102767	103237	ENV7, RVB2	470
chrXVI	132998	133255	FLC1	257
chrXVI	163625	163954	PGC1, HRR25	329
chrXVI	188586	188969	COA2, GUP2	383
chrXVI	227631	228106	OYE3, DAP1	475
chrXVI	425226	425574	RGL1	348
chrXVI	555749	556341	CIT3	592
chrXVI	731829	732202	PRE2	373
