# Supplementary material for: Transcription factor condensates, 3D clustering, and gene expression enhancement of the MET regulon
Source: eLife. 2024 Sep 30;13:RP96028. doi: 10.7554/eLife.96028 (PMC11441978; doi:10.7554/eLife.96028)
Supplement: Supplementary file 4. [file elife-96028-supp4.xlsx]

## Sheet: Full Length Met4 
RNA-seq counts (FPKM) of MET genes bound by all Met TFs
Systematic Name	Standard Name	+met1	+met2	-met1	-met2
YER091C	MET6	222.45	105.96	1285.31	1411.73
YGL125W	MET13	58.78	6.53	112.93	147.61
YLR092W	SUL2	4.97	5.24	75.44	181.88
YLR303W	MET17	18140.00	123.00	460392.00	356338.00
YNL277W	MET2	0.08	0.41	7.61	5.15
YDR253C	MET32	3.56	4.95	59.36	151.01
YOL086C	ADH1	2584.40	2719.00	2126.28	2213.81
YGR204W	ADE3	82.12	10.30	202.85	279.28
YPL250C	ATG41	40.07	57.48	90.34	250.75
YFR030W	MET10	6.96	4.94	202.53	336.29
YJR137C	MET5	2.81	2.07	178.71	340.41
YAL012W	CYS3	70.82	37.52	465.65	690.82
YIR017C	MET28	5.29	6.16	51.39	151.65
YKL069W	YKG9	27.53	31.82	33.29	32
YKL068W	NUP100	27.50	10.70	74.07	192.09
YKL001C	MET14	31.20	22.93	1049.73	1790.94
YJR139C	HOM6	147.65	126.86	362.06	318.96
YIL046W	MET30	0.91	0.66	0.12	0.39
YEL072W	RMD6	3.64	2.00	20.89	43.21
YPR167C	MET16	22.91	22.35	216.26	396.90
YKL201C	MNN4	5.67	5.60	28.74	53.72
YDL059C	RAD59	6.98	9.74	53.14	101.83
YJL101C	GSH1	16.22	15.16	39.38	66.86
YJL060W	BNA3	23.38	24.81	154.22	262.56
YDR502C	SAM2	446.94	167.18	1178.59	1382.92
YGR155W	CYS4	160.23	22.07	385.74	653.70
YGR055W	MUP1	33.65	78.67	157.48	395.65
YKR069W	MET1	4.59	3.98	98.98	314.57
YHL036W	MUP3	3.87	5.02	6.95	28.96
YBR011C	IPP1	380.71	359.72	799.67	636.22
YBR213W	MET8	6.18	4.80	38.88	129.59
YNL241C	ZWF1	82.45	99.09	155.03	187.63
YER052C	HOM3	35.67	17.95	118.04	172.21
YGL184C	STR3	3.70	4.27	53.26	203.81
YDR254W	CHL4	6.93	7.95	12.28	16.59
YJR138W	IML1	3.311	2.87	5.54	5.66
YIR018W	YAP5	8.14	10.2	15.67	25.51
YIL047C	SYG1	18.76	10.81	38.77	66.63
YJL100W	LSB6	7.36	8.84	11.82	14.5
YGR154C	GTO1	5.93	56.34	20.74	35.83

## Sheet: IDR2.3 Met4 
RNA-seq counts (FPKM) of MET genes bound by all Met TFs
Systematic Name	Standard Name	∆IDR2-3 minus1	∆IDR2-3 minus2
YER091C	MET6	768.48	682.21
YGL125W	MET13	60.96	72.66
YLR092W	SUL2	73.33	76.43
YLR303W	MET17	212387.00	230382.00
YNL277W	MET2	3.39	3.02
YDR253C	MET32	54.86	56.41
YOL086C	ADH1	2709.27	2940.23
YGR204W	ADE3	124.95	121.65
YPL250C	ATG41	65.44	99.34
YFR030W	MET10	79.50	76.83
YJR137C	MET5	57.40	53.46
YAL012W	CYS3	172.42	158.55
YIR017C	MET28	59.73	67.39
YKL069W	YKG9	27.36	26.12
YKL068W	NUP100	84.42	116.63
YKL001C	MET14	406.25	365.56
YJR139C	HOM6	212.73	198.87
YIL046W	MET30	1.39	0.67
YEL072W	RMD6	27.52	26.62
YPR167C	MET16	118.24	125.77
YKL201C	MNN4	22.08	18.78
YDL059C	RAD59	56.70	56.50
YJL101C	GSH1	35.79	35.30
YJL060W	BNA3	78.94	79.84
YDR502C	SAM2	705.02	677.92
YGR155W	CYS4	249.53	221.61
YGR055W	MUP1	149.87	152.56
YKR069W	MET1	56.49	53.48
YHL036W	MUP3	20.15	23.76
YBR011C	IPP1	709.92	669.61
YBR213W	MET8	30.31	25.57
YNL241C	ZWF1	103.48	112.20
YER052C	HOM3	46.37	58.97
YGL184C	STR3	63.33	72.16
YDR254W	CHL4	10.63	10.64
YJR138W	IML1	3.42	3.32
YIR018W	YAP5	15.9	14.99
YIL047C	SYG1	24.01	20.01
YJL100W	LSB6	8.23	8.48
YGR154C	GTO1	15.51	17.04

## Sheet: DESEQ2 Met4 +,-met Met TF bound
Genes bound by All Met TFs
	GeneID	Base mean	log2(FC)	StdErr	Wald-Stats	P-value	P-adj	neg log P
MET6	YER091C	214592	2.73072	0.360714	7.57033	3.72e-14	2.76e-12	11.5598
MET13	YGL125W	20284.6	1.34597	0.359294	3.74616	0.00017956	0.0017069	2.76779
SUL2	YLR092W	22408.3	4.08654	0.394878	10.3489	4.23e-25	1.01e-22	21.9946
MET17	YLR303W	228813	4.5045	0.2869	15.7006	1.5e-55	1.55e-52	51.8091
MET2	YNL277W-A	91.7432	3.87933	0.458474	8.46141	2.64e-17	2.99e-15	14.5249
MET32	YDR253C	3698.8	3.88308	0.418025	9.28911	1.56e-20	2.36e-18	17.6272
ADH1	YOL086C	309965	-0.296982	0.196117	-1.51431	0.129947	0.294494	0.530923
ADE3	YGR204W	54314.1	1.63274	0.287942	5.67039	1.42e-08	3.8e-07	6.42004
ATG41	YPL250C	5873.33	1.50654	0.42958	3.50699	0.0004532	0.00372691	2.42865
MET10	YFR030W	51907.3	5.04059	0.332985	15.1376	9.15e-52	8.13e-49	48.0902
MET5	YJR137C	69191.3	6.08448	0.358512	16.9715	1.34e-64	2.77e-61	60.558
CYS3	YAL012W	45863.4	3.0659	0.364365	8.41436	3.95e-17	4.39e-15	14.358
MET28	YIR017C	72.2716	2.74333	0.521311	5.26236	1.42e-07	3.15e-06	5.50217
YKG9	YKL069W	2090.45	0.126759	0.2196	0.577225	0.563787	0.736224	0.13299
NUP100	YKL068W-A	2537.08	2.30231	0.476741	4.82926	1.37e-06	2.35e-05	4.62981
MET14	YKL001C	54443.4	5.26508	0.335157	15.7093	1.31e-55	1.55e-52	51.8091
HOM6	YJR139C	31337.7	1.28555	0.219152	5.86602	4.46e-09	1.33e-07	6.87595
MET30	YIL046W	5513.48	1.49279	0.341345	4.37325	1.22e-05	0.00016726	3.77661
RMD6	YEL072W	1616.8	3.06025	0.405023	7.55573	4.17e-14	2.98e-12	11.5263
MET16	YPR167C	15919.4	3.44438	0.333277	10.3349	4.9e-25	1.09e-22	21.9633
MNN4	YKL201C	9130.28	2.60247	0.340767	7.63708	2.22e-14	1.71e-12	11.7682
RAD59	YDL059C	4008.56	2.94321	0.363925	8.0874	6.09e-16	6.01e-14	13.2208
GSH1	YJL101C	8581.3	1.6284	0.315846	5.15569	2.53e-07	5.29e-06	5.27656
BNA3	YJL060W	19062.5	2.87254	0.315743	9.09771	9.23e-20	1.27e-17	16.8946
SAM2	YDR502C	117244	1.79012	0.410938	4.35618	1.32e-05	0.00017849	3.74838
CYS4	YGR155W	61337.2	1.87355	0.402412	4.65579	3.23e-06	5.12e-05	4.29086
MUP1	YGR055W	32336.5	2.90625	0.44804	6.4866	8.78e-11	3.64e-09	8.43904
MET1	YKR069W	22856.3	4.69435	0.445766	10.531	6.22e-26	1.61e-23	22.7929
MUP3	YHL036W	2216.02	1.62738	0.495524	3.28417	0.00102284	0.00751653	2.12398
IPP1	YBR011C	57901	0.900888	0.226488	3.97764	6.96e-05	0.00076668	3.11539
MET8	YBR213W	4677.72	3.27627	0.458263	7.14934	8.72e-13	5.11e-11	10.2912
ZWF1	YNL241C	25303.9	0.863647	0.246587	3.5024	0.00046109	0.00378181	2.4223
HOM3	YER052C	16329.3	2.17929	0.371514	5.86598	4.46e-09	1.33e-07	6.87595
STR3	YGL184C	11262.4	4.04063	0.475487	8.49788	1.93e-17	2.22e-15	14.653
CHL4	YDR254W	1859.56	0.955101	0.26704	3.57663	0.000348054	0.00300535	2.52211
IML1	YJR138W	2529.83	0.805704	0.2161	3.72839	0.000192703	0.00181246	2.74173
YAP5	YIR018W	1376.09	1.06252	0.323265	3.28683	0.00101321	0.0074723	2.12655
SYG1	YIL047C	5428.89	1.41596	0.342714	4.13161	3.6023e-05	0.000433182	3.36333
LSB6	YJL100W	2384.09	0.66057	0.25102	2.63155	0.0084997	0.0403687	1.39396
GTO1	YGR154C	2323.09	1.82759	0.343689	5.31756	1.05166e-07	2.41262e-06	5.61751

## Sheet: DESEQ2 IDR2.3 +,- Met TF bound
Genes bound by All Met TFs
	GeneID	Base mean	log2(FC)	StdErr	Wald-Stats	P-value	P-adj	neg log P
MET6	YER091C	286406	-0.822566	0.124032	-6.63189	3.31e-11	4.19e-10	9.37727
MET13	YGL125W	22216.6	-0.842688	0.179515	-4.69425	2.68e-06	1.58e-05	4.80198
SUL2	YLR092W	33162.9	-0.53535	0.445147	-1.20264	0.229117	0.353682	0.451387
MET17	YLR303W	320042	-0.93211	0.204533	-4.55726	5.18e-06	2.9e-05	4.53764
MET2	YNL277W-A	132.758	-0.75917	0.274814	-2.76249	0.00573621	0.0160683	1.79403
MET32	YDR253C	5259.76	-0.619012	0.456269	-1.35668	0.174883	0.285353	0.544617
ADH1	YOL086C	313299	0.428676	0.11157	3.84222	0.00012193	0.00051653	3.2869
ADE3	YGR204W	61432.2	-0.88437	0.177539	-4.98126	6.32e-07	4.2e-06	5.37638
ATG41	YPL250C	6536.38	-0.643169	0.479904	-1.34021	0.180179	0.291999	0.534619
MET10	YFR030W	63491.1	-1.63854	0.226721	-7.22712	4.93e-13	7.32e-12	11.1356
MET5	YJR137C	80456.9	-2.02052	0.259339	-7.79104	6.65e-15	1.25e-13	12.902
CYS3	YAL012W	52174.6	-1.68491	0.198123	-8.5044	1.83e-17	4.25e-16	15.3719
MET28	YIR017C	95.7072	-0.808078	0.415504	-1.94481	0.0517977	0.106521	0.972563
YKG9	YKL069W	1940.14	-0.235034	0.113298	-2.07447	0.0380358	0.0825001	1.08355
NUP100	YKL068W	4179.74	-0.697674	0.125071	-5.57822	2.43e-08	2.09e-07	6.68044
MET14	YKL001C	65835	-1.72152	0.234847	-7.33037	2.3e-13	3.53e-12	11.4517
HOM6	YJR139C	34945.6	-0.674762	0.11528	-5.85327	4.82e-09	4.52e-08	7.34439
MET30	YIL046W-A	19.4519	0.717778	0.469783	1.52789	0.126539	0.220074	0.657431
RMD6	YEL072W	2684.07	-0.144009	0.414966	-0.347037	0.728563	0.819824	0.0862795
MET16	YPR167C	20135.4	-1.18607	0.251955	-4.70747	2.51e-06	1.49e-05	4.82692
MNN4	YKL201C	11734	-0.865219	0.261108	-3.31364	0.00092091	0.00316495	2.49963
RAD59	YDL059C	6125.98	-0.374218	0.262573	-1.4252	0.154101	0.257351	0.589473
GSH1	YJL101C	10750.3	-0.504395	0.233711	-2.1582	0.0309126	0.0694245	1.15849
BNA3	YJL060W	22880.2	-1.26255	0.233421	-5.40892	6.34e-08	5.1e-07	6.29235
SAM2	YDR502C	141834	-0.816195	0.131113	-6.22514	4.81e-10	5.14e-09	8.28944
CYS4	YGR155W	70531.9	-1.02923	0.234014	-4.39816	1.09e-05	5.74e-05	4.24102
MUP1	YGR055W	44573.6	-0.589536	0.452525	-1.30277	0.192653	0.307522	0.512124
MET1	YKR069W	27450	-1.17402	0.482848	-2.43144	0.0150389	0.0370701	1.43098
MUP3	YHL036W	3888.87	0.177967	0.500966	0.355247	0.722404	0.815995	0.0883126
IPP1	YBR011C	72976.8	-0.0020376	0.14098	-0.0144534	0.988468	0.993965	0.0026288
MET8	YBR213W	5654.6	-0.954641	0.487897	-1.95665	0.0503891	0.104027	0.982854
ZWF1	YNL241C	26194.1	-0.599966	0.145261	-4.13027	3.62e-05	0.00017283	3.76237
HOM3	YER052C	18215.4	-1.34173	0.213287	-6.29071	3.16e-10	3.47e-09	8.45964
STR3	YGL184C	16232.2	-0.500104	0.49572	-1.00884	0.31305	0.448164	0.348563
CHL4	YDR254W	2079.02	-0.414216	0.183092	-2.26234	0.0236765	0.0552452	1.25771
IML1	YJR138W	2530.66	-0.6685	0.110032	-6.07551	1.23592e-09	1.2413e-08	7.90612
YAP5	YIR018W	1624.75	-0.333753	0.232519	-1.43538	0.151179	0.253538	0.595957
SYG1	YIL047C	5684.21	-1.04819	0.23636	-4.43473	9.21886e-06	4.91166e-05	4.30877
LSB6	YJL100W	2342.11	-0.594709	0.154227	-3.85607	0.000115224	0.000489988	3.30981
GTO1	YGR154C	2834.62	-0.719504	0.244297	-2.9452	0.00322743	0.00965707	2.01515
