# Supplementary figures and images for: Transcription factor condensates, 3D clustering, and gene expression enhancement of the MET regulon
Source: eLife journal article supplement (doi:10.7554/elife.96028), 2024-05-02

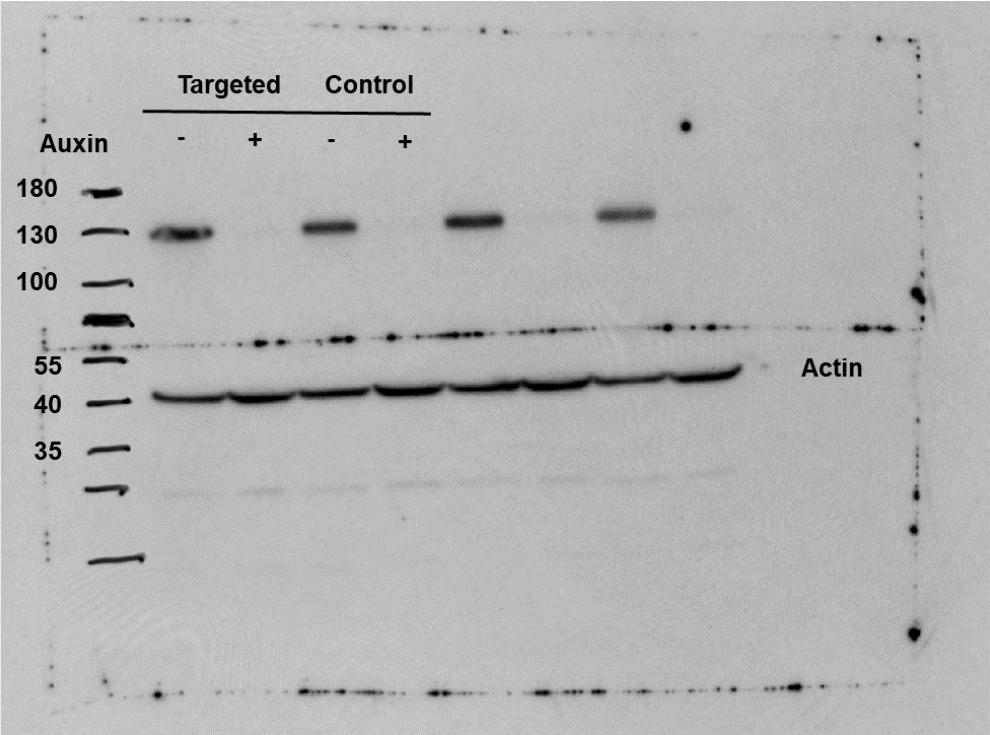

Supplement: fig4-figsupp1-data1 [file elife-96028-fig4-figsupp1-data1-v1.zip]

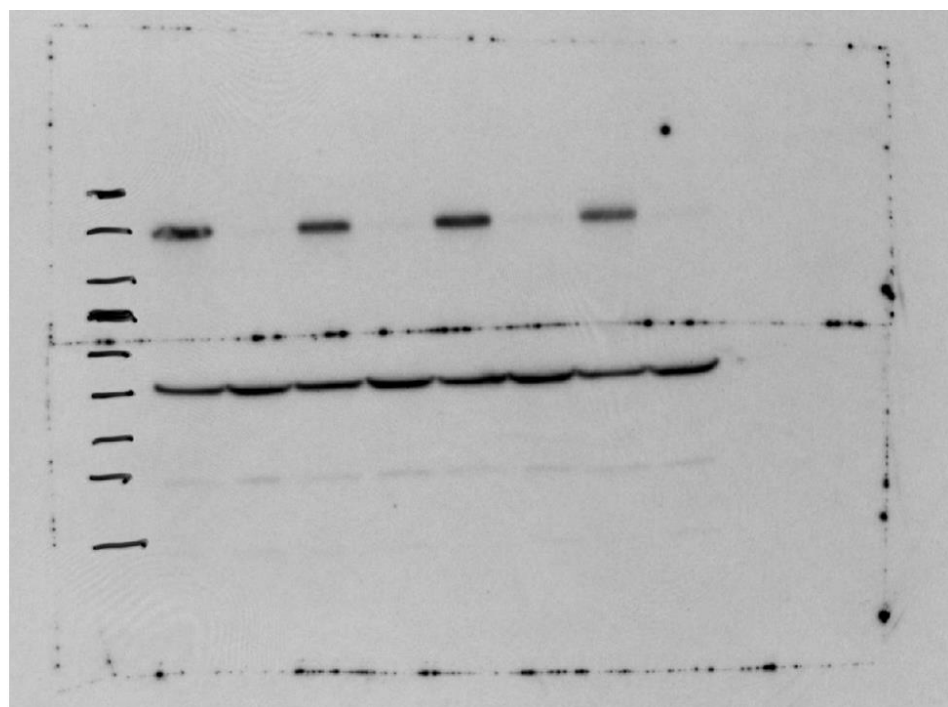

Supplement: fig4-figsupp1-data2 [file elife-96028-fig4-figsupp1-data2-v1.zip]
